# Supplementary material for: Clinical Presentations of Drug-Induced Hyperprolactinaemia: A Literature Review
Source: PubMed Central journal article supplement — Pharmaceut Med. 2023 Feb 17;37(2):153–66. doi: 10.1007/s40290-023-00462-2 (PMC10097739; doi:10.1007/s40290-023-00462-2), 2023-02-17
Supplement: 40290_2023_462_MOESM1_ESM.pdf [file 40290_2023_462_MOESM1_ESM.pdf]

## **PHARMACEUTICAL MEDICINE**

### **SUPPLEMENTAL MATERIAL**

#### **Clinical Presentations of Drug-Induced Hyperprolactinaemia: A Literature Review**

Daniela R. Junqueira<sup>1</sup> · Dimitri Bennett<sup>2,3</sup> · Susanna Y. Huh<sup>2</sup> · Carolina Casañas i Comabella<sup>1</sup>

<sup>1</sup> Evidera (Evidence Synthesis), Waltham, MA, USA

<sup>2</sup> Takeda Development Center Americas, Inc., Cambridge, MA, USA

<sup>3</sup> University of Pennsylvania Perelman School of Medicine, Philadelphia, PA, USA

#### **Corresponding author:**

Dimitri Bennett

Company: Takeda Development Center Americas, Inc.

Company Phone: 617-444-3339

E-mail: [dimitri.bennett@takeda.com](mailto:dimitri.bennett@takeda.com)

**Table S1a** Embase search strategy (via OvidSP)

| Number | Search terms                                                                                                                                                                                                                                                                                                                                                              | Results<br>(18 March 2021) |
|--------|---------------------------------------------------------------------------------------------------------------------------------------------------------------------------------------------------------------------------------------------------------------------------------------------------------------------------------------------------------------------------|----------------------------|
| 1      | (prolactin\$ or hyperprolactinaemia\$ or hyperprolactinemia\$).ti,ab.                                                                                                                                                                                                                                                                                                     | 56,526                     |
| 2      | exp drug induced disease/ or (drug-induced or medication-induced or medicine-induced or therapy-induced or drug complication\$ or therapy complication\$ or drug disease or drug injur\$ or medication injur\$ or medicine injury\$ or drug-related disease or medicine-related disease or therapy-related disease or iatrogenic drug\$).tw. or adverse drug reaction.fs. | 1,332,950                  |
| 3      | 1 and 2                                                                                                                                                                                                                                                                                                                                                                   | 3,583                      |
| 4      | 3 not ((exp animal/ or nonhuman/) not exp human/)                                                                                                                                                                                                                                                                                                                         | 3,457                      |
| 5      | (case report or case series or woman or man or child or adolescent or female or male or boy or girl or infant).ti.                                                                                                                                                                                                                                                        | 916,730                    |
| 6      | case reports/ or case study/ or case report\$.jx. or case report\$.jw.                                                                                                                                                                                                                                                                                                    | 151,291                    |
| 7      | (Ephemera or "Introductory Journal Article" or News or "Newspaper Article" or Editorial or Comment or Overall).pt. or in vitro Techniques/ or in vitro study/ or (commentary or editorial or comment or letter or mice or rat or mouse or animal or murine).ti.                                                                                                           | 3,346,142                  |
| 8      | review.pt. not (systematic or (meta and analy*) or ((indirect or mixed) and "treatment comparison")).ti,ab.                                                                                                                                                                                                                                                               | 2,540,575                  |
| 9      | or/5-8                                                                                                                                                                                                                                                                                                                                                                    | 6,753,483                  |
| 10     | 4 not 9                                                                                                                                                                                                                                                                                                                                                                   | 2,400                      |
| 11     | 10 not conference abstract.pt.                                                                                                                                                                                                                                                                                                                                            | 2,333                      |
| 12     | limit 11 to English language                                                                                                                                                                                                                                                                                                                                              | 2,036                      |

Note: Searches were calibrated to capture records mentioning HPL in either the title or abstract. This allowed the retrieval of studies more likely to provide relevant data on HPL beyond its occurrence as a result of treatment interventions, thus aiding the balance of scientific sensibility and precision according to the nature of the research question under consideration. It is conceivable that the use of controlled vocabulary for HPL and PRL blood levels ('exp hyperprolactinemia" and 'exp prolactin blood level/') could have retrieved additional interventional studies. However, in the context of the current review, interventional studies were not anticipated to provide detailed information on the consequences of HPL. This rationale follows guidance provided in Chapter 4 of the Cochrane Handbook for Systematic Reviews of Interventions.[1]

*HPL* hyperprolactinaemia, *PRL* prolactin

**Table S1b** MEDLINE and MEDLINE In-Process search strategy (via OvidSP)

| Number | Search terms                                                                                                                                                                                                                                                                                                                                                                                     | Results<br>(18 March<br>2021) |
|--------|--------------------------------------------------------------------------------------------------------------------------------------------------------------------------------------------------------------------------------------------------------------------------------------------------------------------------------------------------------------------------------------------------|-------------------------------|
| 1      | (prolactin\$ or hyperprolactinaemia\$ or hyperprolactinemia\$).ti,ab.                                                                                                                                                                                                                                                                                                                            | 46,931                        |
| 2      | exp "Drug-Related Side Effects and Adverse Reactions"/ or (drug-induced or medication-induced or medicine-induced or therapy-induced or drug complication\$ or therapy complication\$ or drug disease or drug injur\$ or medication injur\$ or medicine injury\$ or drug-related disease or medicine-related disease or therapy-related disease or iatrogenic drug\$).tw. or adverse effects.fs. | 1,867,354                     |
| 3      | 1 and 2                                                                                                                                                                                                                                                                                                                                                                                          | 3,358                         |
| 4      | 3 not (exp animals/ not exp humans/)                                                                                                                                                                                                                                                                                                                                                             | 3,091                         |
| 5      | (case report or case series or woman or man or child or adolescent or female or male or boy or girl or infant).ti.                                                                                                                                                                                                                                                                               | 823,373                       |
| 6      | case reports/ or case study/ or case report\$.jw.                                                                                                                                                                                                                                                                                                                                                | 2,191,203                     |
| 7      | (Ephemera or "Introductory Journal Article" or News or "Newspaper Article" or Editorial or Comment or Overall).pt. or in vitro Techniques/ or in vitro study/ or (commentary or editorial or comment or letter or mice or rat or mouse or animal or murine).ti.                                                                                                                                  | 3,076,613                     |
| 8      | review.pt. not (systematic or (meta and analy*) or ((indirect or mixed) and "treatment comparison")).ti,ab.                                                                                                                                                                                                                                                                                      | 2,599,167                     |
| 9      | or/5-8                                                                                                                                                                                                                                                                                                                                                                                           | 8,067,879                     |
| 10     | 4 not 9                                                                                                                                                                                                                                                                                                                                                                                          | 1,991                         |
| 11     | limit 10 to English language                                                                                                                                                                                                                                                                                                                                                                     | 1,789                         |

Note: Searches were calibrated to capture records mentioning HPL in either the title or abstract. This allowed the retrieval of studies more likely to provide relevant data on HPL beyond its occurrence as a result of treatment interventions, thus aiding the balance of scientific sensibility and precision according to the nature of the research question under consideration. It is conceivable that the use of controlled vocabulary for HPL and PRL blood levels ('exp hyperprolactinemia" and 'exp prolactin blood level/') could have picked additional interventional studies. However, in the context of the current review, interventional studies were not anticipated to provide detailed information on the consequences of HPL. This rationale follows guidance provided in Chapter 4 of the Cochrane Handbook for Systematic Reviews of Interventions.[1]

*HPL* hyperprolactinaemia, *PRL* prolactin

**Table S2** Study characteristics

| Author, year             | Study design                      | Geographic location | Study setting              | Sample size <sup>a</sup> (N) | Patients with drug-induced HPL <sup>b</sup> (n) | Study years (range)        | Study duration/ observation period | Definition of HPL                                     |
|--------------------------|-----------------------------------|---------------------|----------------------------|------------------------------|-------------------------------------------------|----------------------------|------------------------------------|-------------------------------------------------------|
| <b>Clinical trials</b>   |                                   |                     |                            |                              |                                                 |                            |                                    |                                                       |
| Kelly, 2006[2]           | RCT                               | US                  | NR                         | 27                           | 13                                              | NR                         | 12 weeks                           | PRL > 18 ng/mL                                        |
| Man, 2016[3]             | RCT                               | China               | NR                         | 99                           | 99                                              | 2013–2014                  | NR                                 | PRL > 24 ng/mL                                        |
| Yuan, 2008[4]            | RCT, crossover                    | China               | NR                         | 20                           | 20                                              | 2004–2005                  | NR                                 | Males: PRL ≥ 20 ng/mL;<br>females: PRL ≥ 25 ng/mL     |
| Shim, 2007[5]            | RCT                               | South Korea         | NR                         | 56                           | 54                                              | NR                         | 8 weeks                            | Males: PRL > 20 ng/mL;<br>females: PRL > 24 ng/mL     |
| Atmaca, 2002[6]          | RCT                               | Turkey              | Inpatients and outpatients | 35                           | 2                                               | 2000 (October to December) | 6 weeks                            | Males: PRL ≥ 15 ng/mL;<br>females: PRL ≥ 20 ng/mL     |
| Yoon, 2016[7]            | RCT                               | South Korea         | Inpatients and outpatients | 42                           | 42                                              | NR                         | 8 weeks                            | Males: PRL > 20 ng/mL;<br>females: PRL > 24 ng/mL     |
| Karaman, 1993[8]         | RCT                               | Turkey              | NR                         | 37                           | 21                                              | 1987–1991                  | NR                                 | PRL ≥ 20 ng/mL                                        |
| Kinon, 2006[9]           | RCT                               | US                  | Inpatients and outpatients | 54                           | 54                                              | NR                         | 4 months                           | Males: PRL > 18.8 ng/mL;<br>females: PRL > 24.2 ng/mL |
| Lee, 2010[10]            | RCT                               | South Korea         | Outpatients                | 60                           | 60                                              | NR                         | 8 weeks                            | Males: PRL > 20 ng/mL;<br>females: PRL > 25 ng/mL     |
| Perez-Iglesias, 2012[11] | RCT                               | Spain               | NR                         | 141                          | n = 64 at 3 months; n = 28 at 1 year            | 2002–2005                  | 1 year                             | Males: PRL > 17.7 ng/mL;<br>females: PRL > 29.2 ng/mL |
| Qiao, 2016[12]           | RCT                               | China               | Inpatients                 | 60                           | 60                                              | 2012–2014                  | 8 weeks                            | PRL ≥ 496 mIU/L                                       |
| Cavallaro, 2004[13]      | Non-randomised uncontrolled trial | Italy               | Outpatients                | 19                           | 19                                              | 2002–2003                  | 8 weeks                            | Males: PRL > 18 ng/mL;<br>females: > 29 ng/mL         |
| Lee, 2006a[14]           | Non-randomised uncontrolled trial | South Korea         | Outpatients                | 7                            | 7                                               | 2004–2005                  | 8 weeks                            | PRL > 19.7 ng/mL                                      |

| Author, year                 | Study design                                                      | Geographic location | Study setting              | Sample size <sup>a</sup> (N) | Patients with drug-induced HPL <sup>b</sup> (n) | Study years (range)        | Study duration/ observation period | Definition of HPL                                                                                                                                 |
|------------------------------|-------------------------------------------------------------------|---------------------|----------------------------|------------------------------|-------------------------------------------------|----------------------------|------------------------------------|---------------------------------------------------------------------------------------------------------------------------------------------------|
| Lu, 2008[15]                 | Non-randomised uncontrolled trial                                 | Taiwan              | NR                         | 23                           | 20                                              | NR                         | NR                                 | PRL > 25 ng/mL                                                                                                                                    |
| Savitz, 2015[16]             | Non-randomised uncontrolled trial                                 | Multiple countries  | Outpatients                | 400                          | 220                                             | 2007–2012                  | 2 years                            | NR                                                                                                                                                |
| Trives, 2013[17]             | Non-randomised uncontrolled trial                                 | Spain               | Outpatients                | 13                           | 13                                              | NR                         | 3 months                           | Increase in serum PRL levels, defined as 2 x ULN, or less than 2 x ULN if relevant clinical signs existed                                         |
| Ranjbar, 2015[18]            | Non-randomised controlled trial (before-and-after clinical trial) | Iran                | Outpatients                | 30                           | 30                                              | 2013–2014                  | 3 months                           | NR                                                                                                                                                |
| Andersen, 1982[19]           | Non-randomised uncontrolled trial                                 | Denmark             | NR                         | 13                           | 13                                              | NR                         | NR                                 | NR (description of individual serum PRL levels in tables and figures shows that all patients developed HPL induced by the treatment intervention) |
| Düring, 2019[20]             | Non-randomised uncontrolled trial                                 | Denmark             | Inpatients and outpatients | 56                           | 36                                              | NR                         | 6 weeks                            | Males: PRL > 0.4 IU/L; females: PRL > 0.6 IU/L                                                                                                    |
| Mir, 2008[21]                | Non-randomised uncontrolled trial                                 | UK                  | Outpatients                | 27                           | 27                                              | NR                         | 26 weeks                           | Males: PRL > 410 mU/L; females: PRL > 510 mU/L                                                                                                    |
| <b>Observational studies</b> |                                                                   |                     |                            |                              |                                                 |                            |                                    |                                                                                                                                                   |
| Ahuja, 2008[22]              | Case report                                                       | NR                  | NR                         | 12                           | 12                                              | NR                         | NR                                 | NR                                                                                                                                                |
| Alosaimi, 2018[23]           | Cross-sectional                                                   | Saudi Arabia        | Inpatients and outpatients | 997                          | 442                                             | 2012–2014                  | NR                                 | Males: PRL > 20 ng/mL; females: PRL > 25 ng/mL                                                                                                    |
| Atluri, 2018[24]             | Retrospective                                                     | South India         | Outpatients                | 40                           | 30                                              | 2017 (January to December) | NR                                 | PRL > 25 ng/mL                                                                                                                                    |

| Author, year           | Study design    | Geographic location | Study setting | Sample size <sup>a</sup> (N) | Patients with drug-induced HPL <sup>b</sup> (n) | Study years (range) | Study duration/ observation period | Definition of HPL                                     |
|------------------------|-----------------|---------------------|---------------|------------------------------|-------------------------------------------------|---------------------|------------------------------------|-------------------------------------------------------|
| Barszcz, 2007[25]      | Case series     | Poland              | NR            | 25                           | 25                                              | NR                  | 3 months                           | PRL > 23.5 ng/mL                                      |
| Chen, 2010[26]         | Prospective     | Taiwan              | Outpatients   | 26                           | 24                                              | NR                  | 8 weeks                            | Males: PRL > 17.7 ng/mL;<br>females: PRL > 29.2 ng/mL |
| Emsley, 2008[27]       | Prospective     | South Africa        | Inpatients    | 50                           | 18                                              | 2004–2006           | 24 months                          | NR                                                    |
| Furuhjelm, 1980[28]    | Case series     | Sweden              | Outpatients   | 17                           | 7                                               | 1976                | NR                                 | PRL > 25 ug/L                                         |
| Holzer, 2006[29]       | Case report     | Switzerland         | NR            | 5                            | 5                                               | 2003–2004           | NR                                 | NR                                                    |
| Kalkavoura, 2013[30]   | Prospective     | Greece              | Outpatients   | 83                           | 80                                              | NR                  | 6 months                           | Males: PRL > 20 ng/ml;<br>females: PRL > 25 ng/ml     |
| Kopecek, 2006[31]      | Cross-sectional | Czech Republic      | Inpatients    | 12                           | 11                                              | NR                  | NR                                 | Males: PRL > 381 mIU/mL;<br>females: > 513 mIU/mL     |
| Kotan, 2011[32]        | Prospective     | Turkey              | Outpatients   | 21                           | 18                                              | NR                  | 24 weeks                           | NR                                                    |
| Kulshreshtha, 2017[33] | Retrospective   | India               | Outpatients   | 128                          | 39                                              | 2010–2014           | NR                                 | PRL > 25 ng/mL                                        |
| Lankford, 1981[34]     | Cross-sectional | US                  | NR            | 10                           | 9                                               | NR                  | NR                                 | PRL > 30 ng/mL                                        |
| Lee, 2005[35]          | Case series     | South Korea         | Outpatients   | 16                           | 14                                              | 2001–2002           | 6 months                           | PRL > 25 ng/mL                                        |
| Lee, 2006b[36]         | Prospective     | South Korea         | Inpatients    | 27                           | 9                                               | NR                  | 12 weeks                           | NR                                                    |
| Leonard, 1989[37]      | Retrospective   | Canada              | Outpatients   | 66                           | 10                                              | 1978–1987           | NR                                 | PRL > 15 ng/mL                                        |
| Margari, 2015[38]      | Prospective     | Italy               | Outpatients   | 34                           | 13                                              | 2010–2013           | Mean: 5.5 (range 3–12) months      | Males: PRL > 20 ng/mL;<br>females: > 25 ng/mL         |
| Matsuoka, 1986[39]     | Case series     | Japan               | Inpatients    | 35                           | 19                                              | NR                  | 8 weeks                            | PRL > 30 ng/mL                                        |
| Melkersson, 1999[40]   | Retrospective   | Sweden              | NR            | 28                           | 9                                               | NR                  | NR                                 | PRL reference value < 15 ng/mL                        |
| Melkersson, 2005[41]   | Cross-sectional | Sweden              | Outpatients   | 75                           | 23                                              | NR                  | NR                                 | Males and females after menopause: PRL ≥ 10 ng/mL;    |

| Author, year         | Study design                                        | Geographic location | Study setting | Sample size <sup>a</sup> (N) | Patients with drug-induced HPL <sup>b</sup> (n) | Study years (range) | Study duration/ observation period | Definition of HPL                                                                                                                                                                                                                  |
|----------------------|-----------------------------------------------------|---------------------|---------------|------------------------------|-------------------------------------------------|---------------------|------------------------------------|------------------------------------------------------------------------------------------------------------------------------------------------------------------------------------------------------------------------------------|
| Park, 2016[42]       | Cross-sectional                                     | South Korea         | Inpatients    | 245                          | 94                                              | 2011–2013           | NR                                 | females pre-menopause: PRL $\geq$ 20 ng/mL<br>Excess PRL levels:<br>mild ( $\leq$ 50 ng/mL)<br>moderate (51–75 ng/mL)<br>severe (76–100 ng/mL)<br>extreme ( $>$ 100 ng/mL)                                                         |
| Pollock, 1998[43]    | Case report                                         | UK                  | NR            | 8                            | 8                                               | NR                  | 18 months                          | PRL $>$ 500 mU/L                                                                                                                                                                                                                   |
| Roke, 2012[44]       | Retrospective                                       | Netherlands         | Outpatients   | 98                           | 24                                              | 2006–2009           | NR                                 | PRL above the 97.5th percentile based on normative data for age and sex                                                                                                                                                            |
| Seppala, 1977[45]    | Case series                                         | Finland             | Outpatients   | 123                          | 10                                              | 1976                | NR                                 | PRL $>$ 30 ng/mL                                                                                                                                                                                                                   |
| Smith, 1992[46]      | Case series                                         | US                  | Outpatients   | 6                            | 6                                               | 1987–1988           | NR                                 | PRL $\geq$ 25 ng/mL                                                                                                                                                                                                                |
| Trenque, 2011[47]    | Case/non-case study in a pharmacovigilance database | France              | NR            | 11,863                       | 187                                             | 1985–2009           | NR                                 | NR (The introduction section states that "HPL is defined as an elevated level of serum PRL, in the absence of such conditions as pregnancy or lactation, and is caused by an increase in PRL secretion from the pituitary gland.") |
| Venetikou, 2008[48]  | Cross-sectional                                     | Greece              | NR            | 165                          | 6                                               | NR                  | NR                                 | Elevated PRL                                                                                                                                                                                                                       |
| Vilar, 2008[49]      | Retrospective                                       | Brazil              | NR            | 1,234                        | 180                                             | 2000–2006           | NR                                 | NR (normal values were males: PRL $<$ 18 ng/mL and females: PRL $<$ 30 ng/mL)                                                                                                                                                      |
| Yunilainen, 2018[50] | Cross-sectional                                     | Russia              | NR            | 244                          | 120                                             | 2011–2012           | NR                                 | NR (normal values were males: PRL 73–380 mU/L and females: PRL 64–395 mU/L. [HPL was taken as a bioactive PRL level of greater than the ULN])                                                                                      |

| Author, year    | Study design    | Geographic location | Study setting | Sample size <sup>a</sup> (N) | Patients with drug-induced HPL <sup>b</sup> (n) | Study years (range) | Study duration/ observation period | Definition of HPL                                |
|-----------------|-----------------|---------------------|---------------|------------------------------|-------------------------------------------------|---------------------|------------------------------------|--------------------------------------------------|
| Zhang, 2018[51] | Cross-sectional | China               | Inpatients    | 118                          | 66                                              | 2017–2018           | NR                                 | Males: PRL ≥ 20 ng/mL;<br>females PRL ≥ 25 ng/mL |

<sup>a</sup> Patients randomised (if trials) or recruited (if observational studies)

<sup>b</sup> Patients diagnosed with drug-induced HPL

HPL hyperprolactinaemia, NR not reported, PRL prolactin, RCT randomised controlled trial, ULN upper limit of normal

**Table S3** Patients characteristics

| Author, year           | N at baseline | Analysis population | Groups/subgroups                                                               | Patients with drug-induced HPL <sup>a</sup> (n) | Age, years, [mean (SD)] <sup>b</sup>               | Sex (females) [n (%)] | Race/ethnicity [n (%)] | Serum PRL levels [mean (SD)] <sup>b</sup>         |
|------------------------|---------------|---------------------|--------------------------------------------------------------------------------|-------------------------------------------------|----------------------------------------------------|-----------------------|------------------------|---------------------------------------------------|
| <b>Clinical trials</b> |               |                     |                                                                                |                                                 |                                                    |                       |                        |                                                   |
| Andersen, 1982[19]     | 6             | Drug-induced HPL    | Females assigned to metoclopramide; menstruating <sup>c</sup>                  | 6                                               | Median NR (range 21–33)                            | 6 (100)               | NR                     | Median NR (range 19–64) ng/mL                     |
|                        | 7             |                     | Females assigned to metoclopramide; post-menopausal females <sup>c</sup>       | 7                                               | Median NR (range 51–62)                            | 7 (100)               | NR                     | NR                                                |
| Atmaca, 2002[6]        | 17            | Overall population  | Randomised to haloperidol <sup>d</sup>                                         | 2                                               | 30 (11)                                            | 17 (100)              | NR                     | 16 (4) ng/mL                                      |
| Cavallaro, 2004[13]    | 19            | Drug-induced HPL    | Drug-induced HPL assigned to cabergoline after baseline enrolment <sup>c</sup> | 19                                              | 34 (6)                                             | 13 (69)               | NR                     | 87 (52) ng/mL                                     |
| Düring, 2019[20]       | 56            | Overall population  | Assigned to amisulpride <sup>d</sup>                                           | 36                                              | 25 (7)                                             | 17 (48)               | NR                     | 99 (42) ng/mL                                     |
| Karaman, 1993[8]       | 37            | Overall population  | Randomised to bromocriptine vs placebo after baseline enrolment <sup>d</sup>   | 21                                              | Group bromocriptine: 26 (5); group placebo: 25 (5) | 37 (100)              | NR                     | Hyperprolactinaemia group (n = 21): 72 (23) ng/mL |



| Author, year   | N at baseline | Analysis population | Groups/subgroups                                                                                                 | Patients with drug-induced HPL <sup>a</sup> (n) | Age, years, [mean (SD)] <sup>b</sup> | Sex (females) [n (%)] | Race/ethnicity [n (%)]                                                                  | Serum PRL levels [mean (SD)] <sup>b</sup>                                                                                                                                                                                                                                         |
|----------------|---------------|---------------------|------------------------------------------------------------------------------------------------------------------|-------------------------------------------------|--------------------------------------|-----------------------|-----------------------------------------------------------------------------------------|-----------------------------------------------------------------------------------------------------------------------------------------------------------------------------------------------------------------------------------------------------------------------------------|
| Kelly, 2006[2] | 12            | Overall population  | Randomised to risperidone <sup>d</sup>                                                                           | 12                                              | 47 (10)                              | 3 (25)                | Black 6 (50)                                                                            | NR                                                                                                                                                                                                                                                                                |
|                | 9             |                     | Randomised to fluphenazine <sup>d</sup>                                                                          | 1                                               | 46 (10)                              | 1 (12)                | Black 5 (56)                                                                            | NR                                                                                                                                                                                                                                                                                |
| Kinon, 2006[9] | 27            | Drug-induced HPL    | Drug-induced HPL randomised to olanzapine after baseline enrolment <sup>c</sup>                                  | 27                                              | 40 (11)                              | 14 (52)               | Multiple: White 13 (48); African 11 (41); Asian 0 (0); East Asian 2 (7); Hispanic 1 (4) | NR                                                                                                                                                                                                                                                                                |
|                |               |                     | Drug-induced HPL randomised to remain on previous antipsychotic medication after baseline enrolment <sup>c</sup> | 27                                              | 39 (9)                               | 14 (52)               | Multiple: White 15 (56); African 7 (26); Asian 1 (4); East Asian 2 (7); Hispanic 2 (7)  | NR                                                                                                                                                                                                                                                                                |
| Lee, 2006a[14] | 7             | Drug-induced HPL    | Drug-induced HPL <sup>c</sup>                                                                                    | 7                                               | 35 (8)                               | 7 (100)               | NR                                                                                      | 168 (58) ng/mL                                                                                                                                                                                                                                                                    |
| Lee, 2010[10]  | 60            | Drug-induced HPL    | Drug-induced HPL randomised to bromocriptine vs placebo after baseline enrolment <sup>c</sup>                    | 60                                              | 38 (7)                               | 60 (100)              | NR                                                                                      | Group randomised to bromocriptine 2.5 mg (n = 14): 126.21 (57.41) ng/mL; group randomised to bromocriptine 5 mg (n = 13): 114.08 (41.23) ng/mL; group randomised to bromocriptine 10 mg (n = 11): 148.12 (51.17) ng/mL; group randomised to placebo (n = 10): 94.07 (68.98) ng/mL |
| Lu, 2008[15]   | 20            | Drug-induced HPL    | Drug-induced HPL <sup>c</sup>                                                                                    | 20                                              | 32 (10)                              | 20 (100)              | NR                                                                                      | 97 (69) ng/mL                                                                                                                                                                                                                                                                     |
| Man, 2016[3]   | 99            | Drug-induced HPL    | Drug-induced HPL randomised to peony-                                                                            | 99                                              | 30 (8)                               | 99 (100)              | NR                                                                                      | 111 (50) ng/mL                                                                                                                                                                                                                                                                    |

| Author, year             | N at baseline | Analysis population | Groups/subgroups                                                                                       | Patients with drug-induced HPL <sup>a</sup> (n) | Age, years, [mean (SD)] <sup>b</sup> | Sex (females) [n (%)] | Race/ethnicity [n (%)]                                                                                           | Serum PRL levels [mean (SD)] <sup>b</sup> |
|--------------------------|---------------|---------------------|--------------------------------------------------------------------------------------------------------|-------------------------------------------------|--------------------------------------|-----------------------|------------------------------------------------------------------------------------------------------------------|-------------------------------------------|
|                          |               |                     | glycyrrhiza decoction vs placebo after baseline enrolment <sup>c</sup>                                 |                                                 |                                      |                       |                                                                                                                  |                                           |
| Mir, 2008[21]            | 27            | Drug-induced HPL    | Drug-induced HPL <sup>c</sup>                                                                          | 27                                              | 28 (8)                               | 13 (48)               | White 16 (60); Black 7 (26); Asian 3 (11); Mixed 1 (4)                                                           | Median NR (range 28–56) ng/mL             |
| Perez-Iglesias, 2012[11] | 110           | Overall population  | Overall population <sup>d</sup>                                                                        | 28                                              | 28 (8)                               | 43 (40)               | NR                                                                                                               | NR                                        |
| Qiao, 2016[12]           | 30            | Drug-induced HPL    | Drug-induced HPL randomised to aripiprazole adjunctive treatment after baseline enrolment <sup>c</sup> | 30                                              | 35 (7)                               | 30 (100)              | Han Chinese 30 (100)                                                                                             | 102 (38) ng/mL                            |
|                          |               |                     | Drug-induced HPL randomised to non-adjunctive treatment after baseline enrolment <sup>c</sup>          | 30                                              | 33 (7)                               | 30 (100)              | Han Chinese 30 (100)                                                                                             | 123 (73) ng/mL                            |
| Ranjbar, 2015[18]        | 30            | Drug-induced HPL    | Drug-induced HPL assigned to aripiprazole after baseline enrolment <sup>c</sup>                        | 30                                              | 31 (7)                               | 30 (100)              | NR                                                                                                               | NR                                        |
| Savitz, 2015[16]         | 400           | Overall population  | Overall population <sup>d</sup>                                                                        | 220                                             | 16 (2)                               | 157 (39)              | Multiple: American Indian or Alaskan native 1 (< 1); White 256 (66); Black 27 (7); Asian 106 (27); Other 1 (< 1) | NR                                        |
| Shim, 2007[5]            | 26            | Drug-induced HPL    | Drug-induced HPL randomised to aripiprazole after baseline enrolment <sup>c</sup>                      | 26                                              | 39 (6)                               | 15 (58)               | NR                                                                                                               | NR                                        |
|                          | 28            |                     | Drug-induced HPL randomised to placebo after baseline enrolment <sup>c</sup>                           | 28                                              | 41 (5)                               | 17 (61)               | NR                                                                                                               | NR                                        |

| Author, year                 | N at baseline | Analysis population | Groups/subgroups                                                                                 | Patients with drug-induced HPL <sup>a</sup> (n) | Age, years, [mean (SD)] <sup>b</sup>                                            | Sex (females) [n (%)] | Race/ethnicity [n (%)] | Serum PRL levels [mean (SD)] <sup>b</sup>                                                                     |
|------------------------------|---------------|---------------------|--------------------------------------------------------------------------------------------------|-------------------------------------------------|---------------------------------------------------------------------------------|-----------------------|------------------------|---------------------------------------------------------------------------------------------------------------|
| Trives, 2013[17]             | 13            | Drug-induced HPL    | Drug-induced HPL <sup>c</sup>                                                                    | 13                                              | 44 (13)                                                                         | 8 (62)                | White 13 (100)         | Median 84 (range 44–99) ng/mL                                                                                 |
| Yoon, 2016[7]                | 10            | Drug-induced HPL    | Drug-induced HPL (PRL < 50 ng/mL) <sup>c</sup>                                                   | 10                                              | 37 (7)                                                                          | 1 (10)                | NR                     | 32 (10) ng/mL                                                                                                 |
|                              | 32            |                     | Drug-induced HPL (PRL ≥ 50 ng/mL) <sup>c</sup>                                                   | 32                                              | Group addition of aripiprazole: 35 (7); group switching to aripiprazole: 35 (8) | 28 (88)               | NR                     | Group randomised to addition of aripiprazole: 113 (22) ng/mL; group switching to aripiprazole: 112 (60) ng/mL |
| Yuan, 2008[4]                | 10            | Drug-induced HPL    | Drug-induced HPL randomised to peony-glycyrrhiza decoction after baseline enrolment <sup>c</sup> | 10                                              | 32 (8)                                                                          | 10 (100)              | NR                     | 105 (38) ng/mL                                                                                                |
|                              |               |                     | Drug-induced HPL randomised to bromocriptine after baseline enrolment <sup>c</sup>               | 10                                              | 30 (7)                                                                          | 10 (100)              | NR                     | 130 (29) ng/mL                                                                                                |
| <b>Observational studies</b> |               |                     |                                                                                                  |                                                 |                                                                                 |                       |                        |                                                                                                               |
| Ahuja, 2008[22]              | 12            | Drug-induced HPL    | Drug-induced HPL <sup>c</sup>                                                                    | 12                                              | Median NR (range 29–71)                                                         | 12 (100)              | NR                     | NR                                                                                                            |
| Alosaimi, 2018[23]           | 442           | Drug-induced HPL    | Drug-induced HPL <sup>c</sup>                                                                    | 442                                             | 37 (13)                                                                         | 186 (42)              | NR                     | NR                                                                                                            |
| Atluri, 2018[24]             | 15            | Drug-induced HPL    | Drug-induced HPL (levosulpiride)                                                                 | 15                                              | 33 (9)                                                                          | 15 (100)              | NR                     | 144 (54) ng/mL                                                                                                |
|                              | 2             |                     | Drug-induced HPL (ranitidine)                                                                    | 2                                               | NR                                                                              | NR                    | NR                     | NR                                                                                                            |
|                              | 13            |                     | Drug-induced HPL (domperidone)                                                                   | 13                                              | 31 (5)                                                                          | 13 (100)              | NR                     | 122 (56) ng/mL                                                                                                |
| Barszcz, 2007[25]            | 25            | Drug-induced HPL    | Drug-induced HPL <sup>c</sup>                                                                    | 25                                              | 26 (NR)                                                                         | 25 (100)              | NR                     | 69 (43) ng/mL                                                                                                 |

| Author, year           | N at baseline | Analysis population | Groups/subgroups                                                                            | Patients with drug-induced HPL <sup>a</sup> (n) | Age, years, [mean (SD)] <sup>b</sup> | Sex (females) [n (%)] | Race/ethnicity [n (%)] | Serum PRL levels [mean (SD)] <sup>b</sup>                     |
|------------------------|---------------|---------------------|---------------------------------------------------------------------------------------------|-------------------------------------------------|--------------------------------------|-----------------------|------------------------|---------------------------------------------------------------|
| Chen, 2010[26]         | 15            | Drug-induced HPL    | Drug-induced HPL assigned to adjunctive aripiprazole after baseline enrolment (risperidone) | 15                                              | 39 (9)                               | 10 (67)               | Taiwanese 15 (100)     | 77 (51) ng/mL                                                 |
|                        | 5             |                     | Drug-induced HPL assigned to adjunctive aripiprazole after baseline enrolment (amisulpride) | 5                                               | 31 (10)                              | 5 (100)               | Taiwanese 5 (100)      | 145 (55) ng/mL                                                |
|                        | 4             |                     | Drug-induced HPL assigned to adjunctive aripiprazole after baseline enrolment (sulpiride)   | 4                                               | 43 (7)                               | 2 (50)                | Taiwanese 4 (100)      | 71 (49) ng/mL                                                 |
| Furuhjelm, 1980[28]    | 7             | Drug-induced HPL    | Drug-induced HPL <sup>c</sup>                                                               | 7                                               | 36 (7)                               | 8 (100)               | NR                     | Median NR (range 45–≥ 200) ng/mL                              |
| Holzer, 2006[29]       | 5             | Drug-induced HPL    | Drug-induced HPL <sup>c</sup>                                                               | 5                                               | Median NR (range 18–14)              | 2 (40)                | NR                     | Median 59 (range 25–80) ng/mL                                 |
| Kalkavoura, 2013[30]   | 80            | Drug-induced HPL    | Drug-induced HPL                                                                            | 80                                              | 44 (10)                              | 44 (55)               | NR                     | NR                                                            |
| Kopecek, 2006[31]      | 11            | Drug-induced HPL    | Drug-induced HPL <sup>c</sup>                                                               | 11                                              | Median NR (range 18–63)              | 8 (73)                | NR                     | Median NR (range males: 505–1,318; females: 887–4,250) mIU/mL |
| Kotan, 2011[32]        | 18            | Drug-induced HPL    | Drug-induced HPL <sup>c</sup>                                                               | 18                                              | 35 (9)                               | 7 (39)                | NR                     | NR                                                            |
| Kulshreshtha, 2017[33] | 39            | Drug-induced HPL    | Drug-induced HPL <sup>c</sup>                                                               | 39                                              | 37 (10)                              | 39 (100)              | NR                     | 121 (81) ng/mL                                                |
| Lankford, 1981[34]     | 10            | Drug-induced HPL    | Drug-induced HPL <sup>c</sup>                                                               | 9                                               | NR                                   | 9 (100)               | NR                     | 117 (19) ng/mL                                                |
| Lee, 2005[35]          | 14            | Drug-induced HPL    | Drug-induced HPL <sup>c</sup>                                                               | 14                                              | NR                                   | 14 (100)              | NR                     | 120 (48) ng/mL                                                |
| Lee, 2006b[36]         | 9             | Drug-induced HPL    | Drug-induced HPL <sup>c</sup>                                                               | 9                                               | NR                                   | 7 (78)                | NR                     | 104 (24) ng/mL                                                |
| Leonard, 1989[37]      | 10            | Drug-induced HPL    | Drug-induced HPL <sup>c</sup>                                                               | 10                                              | NR                                   | 0 (0)                 | NR                     | 24 (NR) ng/mL                                                 |
| Margari, 2015[38]      | 13            | Drug-induced HPL    | Drug-induced HPL <sup>c</sup>                                                               | 13                                              | NR                                   | 8 (62)                | White: 13 (100)        | 64 (33) ng/mL                                                 |

| Author, year        | N at baseline | Analysis population | Groups/subgroups              | Patients with drug-induced HPL <sup>a</sup> (n) | Age, years, [mean (SD)] <sup>b</sup> | Sex (females) [n (%)] | Race/ethnicity [n (%)] | Serum PRL levels [mean (SD)] <sup>b</sup> |
|---------------------|---------------|---------------------|-------------------------------|-------------------------------------------------|--------------------------------------|-----------------------|------------------------|-------------------------------------------|
| Pollock, 1998[43]   | 8             | Drug-induced HPL    | Drug-induced HPL <sup>c</sup> | 8                                               | Median NR (range 24–48)              | 8 (100)               | NR                     | Median NR (range 169–343) ng/mL           |
| Seppala, 1977[45]   | 10            | Drug-induced HPL    | Drug-induced HPL <sup>c</sup> | 10                                              | NR                                   | 10 (100)              | NR                     | NR                                        |
| Smith, 1992[46]     | 6             | Drug-induced HPL    | Drug-induced HPL <sup>c</sup> | 6                                               | 33 (NR)                              | 6 (100)               | NR                     | 78 (NR) ng/mL                             |
| Trenque, 2011[47]   | 187           | Drug-induced HPL    | Drug-induced HPL <sup>c</sup> | 187                                             | 40 (14)                              | 133 (72)              | NR                     | NR                                        |
| Venetikou, 2008[48] | 6             | Drug-induced HPL    | Drug-induced HPL <sup>c</sup> | 6                                               | NR                                   | 0 (0)                 | NR                     | NR                                        |
| Vilar, 2008[49]     | 180           | Drug-induced HPL    | Drug-induced HPL <sup>c</sup> | 180                                             | 40 (11)                              | 108 (60)              | NR                     | 105 (73) ng/mL                            |

<sup>a</sup> Patients diagnosed with drug-induced HPL

<sup>b</sup> Unless otherwise specified

<sup>c</sup> Overall set of participants enrolled in the study who were diagnosed with drug-induced HPL, regardless of treatment status

<sup>d</sup> Overall set of participants enrolled in the study, regardless of the drug-induced HPL status

*ASEX* Arizona Sexual Experience Scale, *HPL* hyperprolactinaemia, *PRL* prolactin, *SD* standard deviation

**Table S4** Characteristics of patients with drug-induced HPL

| Author, year           | Groups/subgroups                                    | Patients with drug-induced HPL <sup>a</sup> (n) | Diagnosis | ICD/DMS | Treatment known or suspected to have induced HPL (drug) | Treatment known or suspected to have induced HPL (class) | Monotherapy/polytherapy | Dose (total dose/day) <sup>b</sup>                                    | Treatment duration mean (SD) <sup>b</sup>    |
|------------------------|-----------------------------------------------------|-------------------------------------------------|-----------|---------|---------------------------------------------------------|----------------------------------------------------------|-------------------------|-----------------------------------------------------------------------|----------------------------------------------|
| <b>Clinical trials</b> |                                                     |                                                 |           |         |                                                         |                                                          |                         |                                                                       |                                              |
| Andersen, 1982[19]     | Assigned to metoclopramide; menstruating females    | 6                                               | NR        | NR      | Metoclopramide                                          | D2 antagonists                                           | Monotherapy             | 30 mg/day                                                             | 18 days                                      |
|                        | Assigned to metoclopramide; post-menopausal females | 7                                               | NR        | NR      | Metoclopramide                                          | D2 antagonists                                           | Monotherapy             | Group IV (4 women): 10 mg/day, IV; group IV; group oral (3 women): 30 | Group A: 1 day [IV]; group B: 15 days [oral] |

| Author, year           | Groups/<br>subgroups                                                                                         | Patients<br>with drug-<br>induced<br>HPL <sup>a</sup> (n) | Diagnosis                                       | ICD/<br>DMS | Treatment<br>known or<br>suspected to<br>have induced<br>HPL (drug) | Treatment known<br>or suspected to have<br>induced HPL (class) | Monotherapy/<br>polytherapy | Dose (total<br>dose/day) <sup>b</sup> | Treatment<br>duration<br>mean (SD) <sup>b</sup> |
|------------------------|--------------------------------------------------------------------------------------------------------------|-----------------------------------------------------------|-------------------------------------------------|-------------|---------------------------------------------------------------------|----------------------------------------------------------------|-----------------------------|---------------------------------------|-------------------------------------------------|
| Atmaca,<br>2002[6]     | Randomised to<br>haloperidol <sup>c</sup>                                                                    | 2                                                         | Schizophrenia                                   | DSM-IV      | Haloperidol                                                         | Antipsychotics                                                 | Monotherapy                 | mg/day,<br>oral<br>10 mg/day          | 6 weeks                                         |
| Cavallaro,<br>2004[13] | Drug-induced<br>HPL assigned to<br>cabergoline after<br>baseline<br>enrolment <sup>c</sup>                   | 19                                                        | Schizophrenia                                   | DSM-IV      | Risperidone                                                         | Antipsychotics                                                 | Monotherapy                 | Mean: 3.1<br>mg/day                   | At least 6<br>months                            |
| Düring,<br>2019[20]    | Assigned to<br>amisulpride                                                                                   | 36                                                        | Schizophrenia or<br>schizoaffective<br>disorder | ICD-10      | Amisulpride                                                         | Antipsychotics                                                 | Monotherapy                 | Mean: 279<br>mg/day                   | 6 weeks                                         |
| Karaman,<br>1993[8]    | Drug-induced<br>HPL randomised<br>to bromocriptine<br>vs placebo after<br>baseline<br>enrolment <sup>c</sup> | 21                                                        | NR                                              | NR          | NR                                                                  | Oral contraceptives                                            | NR                          | NR                                    | NR                                              |
| Kelly, 2006[2]         | Randomised to<br>risperidone                                                                                 | 12                                                        | Treatment-<br>resistant<br>schizophrenia        | DSM-IV      | Risperidone                                                         | Antipsychotics                                                 | Monotherapy                 | 4 mg/day<br>(fixed dose)              | 12 weeks                                        |
|                        | Randomised to<br>fluphenazine <sup>c</sup>                                                                   | 1                                                         | Treatment-<br>resistant<br>schizophrenia        | DSM-IV      | Fluphenazine                                                        | Antipsychotics                                                 | Monotherapy                 | 12.5<br>mg/day<br>[fixed dose]        | 12 weeks                                        |
| Kinon, 2006[9]         | Drug-induced<br>HPL randomised<br>to olanzapine after<br>baseline<br>enrolment <sup>c</sup>                  | 27                                                        | Schizophrenia or<br>schizoaffective<br>disorder | DSM-IV      | Risperidone,<br>conventional<br>antipsychotics                      | Antipsychotics                                                 | Monotherapy                 | NR                                    | Mean (SD):<br>11.9 (8.4)<br>years               |
|                        | Drug-induced<br>HPL randomised<br>to remain on<br>current<br>antipsychotic                                   |                                                           |                                                 |             |                                                                     |                                                                |                             |                                       | Mean (SD):<br>12.5 (7.8)<br>years               |

| Author, year   | Groups/<br>subgroups                                                                                         | Patients<br>with drug-<br>induced<br>HPL <sup>a</sup> (n) | Diagnosis                                       | ICD/<br>DMS | Treatment<br>known or<br>suspected to<br>have induced<br>HPL (drug)                                                    | Treatment known<br>or suspected to have<br>induced HPL (class) | Monotherapy/<br>polytherapy | Dose (total<br>dose/day) <sup>b</sup>                                                                                                                                                                                                          | Treatment<br>duration<br>mean (SD) <sup>b</sup> |
|----------------|--------------------------------------------------------------------------------------------------------------|-----------------------------------------------------------|-------------------------------------------------|-------------|------------------------------------------------------------------------------------------------------------------------|----------------------------------------------------------------|-----------------------------|------------------------------------------------------------------------------------------------------------------------------------------------------------------------------------------------------------------------------------------------|-------------------------------------------------|
|                | medication after<br>baseline<br>enrolment <sup>c</sup>                                                       |                                                           |                                                 |             |                                                                                                                        |                                                                |                             |                                                                                                                                                                                                                                                |                                                 |
| Lee, 2006a[14] | Drug-induced<br>HPL                                                                                          | 7                                                         | Schizophrenia                                   | DSM-IV      | Amisulpride,<br>risperidone                                                                                            | Antipsychotics                                                 | Monotherapy                 | Amisulpride<br>200–800<br>mg/day,<br>Risperidone<br>6 mg/day                                                                                                                                                                                   | At least 8<br>weeks                             |
| Lee, 2010[10]  | Drug-induced<br>HPL randomised<br>to bromocriptine<br>vs placebo after<br>baseline<br>enrolment <sup>c</sup> | 60                                                        | Schizophrenia                                   | DSM-IV      | Haloperidol,<br>risperidone,<br>trifluoperazine,<br>chlorpromazine,<br>thioridazine,<br>nemonapride, and<br>olanzapine | Antipsychotics                                                 | Polytherapy                 | Haloperidol<br>5–40 mg,<br>risperidone<br>2–10 mg,<br>trifluoperazine<br>10–60<br>mg,<br>chlorpromazine<br>200–<br>300 mg,<br>thioridazine<br>200–300<br>mg,<br>nemonapride<br>20–40<br>mg,<br>olanzapine<br>15 mg<br>[dose<br>schedule<br>NR] | 1 year                                          |
| Lu, 2008[15]   | Drug-induced<br>HPL assigned to<br>aripiprazole after<br>baseline<br>enrolment <sup>c</sup>                  | 20                                                        | Schizophrenia or<br>schizoaffective<br>disorder | DSM-IV      | Sulpiride,<br>risperidone                                                                                              | Antipsychotics                                                 | Monotherapy                 | Sulpiride<br>400–800<br>mg/day,<br>risperidone<br>1.5–6<br>mg/day                                                                                                                                                                              | Mean (SD):<br>16.8 (13.4)<br>months             |

| Author, year                | Groups/<br>subgroups                                                                                                              | Patients<br>with drug-<br>induced<br>HPL <sup>a</sup> (n) | Diagnosis                                                                                                                             | ICD/<br>DMS | Treatment<br>known or<br>suspected to<br>have induced<br>HPL (drug)                                            | Treatment known<br>or suspected to have<br>induced HPL (class) | Monotherapy/<br>polytherapy | Dose (total<br>dose/day) <sup>b</sup>                                                                                                                                                                                                    | Treatment<br>duration<br>mean (SD) <sup>b</sup> |
|-----------------------------|-----------------------------------------------------------------------------------------------------------------------------------|-----------------------------------------------------------|---------------------------------------------------------------------------------------------------------------------------------------|-------------|----------------------------------------------------------------------------------------------------------------|----------------------------------------------------------------|-----------------------------|------------------------------------------------------------------------------------------------------------------------------------------------------------------------------------------------------------------------------------------|-------------------------------------------------|
| Man, 2016[3]                | Drug-induced<br>HPL randomised<br>to peony-<br>glycyrrhiza<br>decoction vs<br>placebo after<br>baseline<br>enrolment <sup>c</sup> | 99                                                        | Schizophrenia or<br>schizoaffective<br>disorder                                                                                       | ICD-10      | Risperidone,<br>paliperidone,<br>sulpride and<br>amisulpride,<br>olanzapine,<br>ziprasidone, and<br>quetiapine | Antipsychotics                                                 | Mixed                       | NR                                                                                                                                                                                                                                       | At least 3<br>months                            |
| Mir, 2008[21]               | Drug-induced<br>HPL assigned to<br>aripiprazole after<br>baseline<br>enrolment <sup>c</sup>                                       | 27                                                        | Schizophrenia,<br>schizoaffective,<br>bipolar affective<br>disorder, psychotic<br>depression, drug-<br>induced affective<br>psychosis | NR          | Risperidone,<br>olanzapine,<br>amisulpride,<br>quetiapine,<br>zuclopenthixol,<br>clozapine                     | Antipsychotics                                                 | Mixed                       | Risperidone<br>(2–25 mg<br>IM every<br>15 days),<br>olanzapine<br>(5–20 mg),<br>amisulpride<br>(150–600<br>mg),<br>quetiapine<br>(150–600<br>mg),<br>zuclopenthi<br>xol (250<br>mg),<br>clozapine<br>(50 mg)<br>[dose<br>schedule<br>NR] | NR                                              |
| Perez-Iglesias,<br>2012[11] | Randomised to<br>haloperidol,<br>olanzapine, or<br>risperidone                                                                    | 28                                                        | Schizophrenia<br>spectrum disorders                                                                                                   | DSM-IV      | Haloperidol,<br>olanzapine, and<br>risperidone                                                                 | Antipsychotics                                                 | Monotherapy                 | NR                                                                                                                                                                                                                                       | 1 year                                          |
| Qiao, 2016[12]              | Drug-induced<br>HPL randomised<br>to aripiprazole<br>adjunctive vs non-<br>adjunctive                                             | 60                                                        | Schizophrenia                                                                                                                         | DSM-IV      | Risperidone,<br>paliperidone                                                                                   | Antipsychotics                                                 | Monotherapy                 | Risperidone<br>and<br>paliperidon<br>e: 1 mg/day<br>and                                                                                                                                                                                  | 4 weeks                                         |



| Author, year         | Groups/<br>subgroups                                                                          | Patients<br>with drug-<br>induced<br>HPL <sup>a</sup> (n) | Diagnosis                                                                                          | ICD/<br>DMS | Treatment<br>known or<br>suspected to<br>have induced<br>HPL (drug) | Treatment known<br>or suspected to have<br>induced HPL (class) | Monotherapy/<br>polytherapy | Dose (total<br>dose/day) <sup>b</sup>                                                                                                                                                              | Treatment<br>duration<br>mean (SD) <sup>b</sup> |
|----------------------|-----------------------------------------------------------------------------------------------|-----------------------------------------------------------|----------------------------------------------------------------------------------------------------|-------------|---------------------------------------------------------------------|----------------------------------------------------------------|-----------------------------|----------------------------------------------------------------------------------------------------------------------------------------------------------------------------------------------------|-------------------------------------------------|
|                      | treatment after<br>baseline<br>enrolment                                                      |                                                           |                                                                                                    |             |                                                                     |                                                                |                             | 3 mg/day<br>respectively<br>, start dose;<br>dosage<br>titrated to<br>6–<br>12mg/day<br>for the first<br>2 weeks.<br>After the<br>third week,<br>3–6 mg/day<br>and 6-12<br>mg/day,<br>respectively |                                                 |
| Ranjbar,<br>2015[18] | Drug-induced<br>HPL assigned to<br>aripiprazole after<br>baseline<br>enrolment <sup>c</sup>   | 30                                                        | Schizophrenia,<br>delusional<br>disorder, or<br>refractory<br>obsessive-<br>compulsive<br>disorder | NR          | Risperidone                                                         | Antipsychotics                                                 | Monotherapy                 | 6 mg/kg                                                                                                                                                                                            | 2 months                                        |
| Savitz,<br>2015[16]  | Assigned to<br>paliperidone                                                                   | 220                                                       | Schizophrenia                                                                                      | DSM-IV      | Paliperidone                                                        | Antipsychotics                                                 | Polytherapy                 | 1.5–12<br>mg/day                                                                                                                                                                                   | 2 years                                         |
| Shim, 2007[5]        | Drug-induced<br>HPL randomised<br>to aripiprazole<br>after baseline<br>enrolment <sup>c</sup> | 26                                                        | Schizophrenia                                                                                      | DSM-IV      | Haloperidol                                                         | Antipsychotics                                                 | Monotherapy                 | Mean (SD):<br>20.7 (12.6)<br>mg/day                                                                                                                                                                | At least 3<br>months                            |
|                      | Drug-induced<br>HPL randomised<br>to placebo after<br>baseline<br>enrolment <sup>c</sup>      | 28                                                        |                                                                                                    |             |                                                                     |                                                                |                             | Mean (SD):<br>24.8 (14.2)<br>mg/day                                                                                                                                                                |                                                 |

| Author, year        | Groups/<br>subgroups                                                                                                                                                                                                                                                                               | Patients<br>with drug-<br>induced<br>HPL <sup>a</sup> (n) | Diagnosis                                                                                          | ICD/<br>DMS | Treatment<br>known or<br>suspected to<br>have induced<br>HPL (drug)                                         | Treatment known<br>or suspected to have<br>induced HPL (class) | Monotherapy/<br>polytherapy | Dose (total<br>dose/day) <sup>b</sup> | Treatment<br>duration<br>mean (SD) <sup>b</sup> |
|---------------------|----------------------------------------------------------------------------------------------------------------------------------------------------------------------------------------------------------------------------------------------------------------------------------------------------|-----------------------------------------------------------|----------------------------------------------------------------------------------------------------|-------------|-------------------------------------------------------------------------------------------------------------|----------------------------------------------------------------|-----------------------------|---------------------------------------|-------------------------------------------------|
| Trives,<br>2013[17] | Drug-induced<br>HPL assigned to<br>aripiprazole after<br>baseline<br>enrolment <sup>c</sup>                                                                                                                                                                                                        | 13                                                        | Schizophrenia,<br>unspecified<br>psychoses,<br>schizoaffective<br>disorder,<br>delusional disorder | NR          | Risperidone<br>(long-acting<br>injection)                                                                   | Antipsychotics                                                 | Mixed                       | 25–37.5<br>mg/day                     | Median: 51<br>(14–57)<br>months                 |
| Yoon, 2016[7]       | Drug-induced<br>HPL and serum<br>PRL level < 50<br>ng/mL<br>randomised to<br>aripiprazole-<br>addition (adding<br>aripiprazole to<br>previous<br>antipsychotics)<br>after baseline<br>enrolment <sup>c</sup>                                                                                       | 10                                                        | Schizophrenia or<br>other another<br>psychotic<br>spectrum disorder                                | DSM-IV      | Paliperidone,<br>risperidone,<br>quetiapine,<br>haloperidol,<br>blonanserin,<br>sulpiride, and<br>clozapine | Antipsychotics                                                 | NR                          | NR                                    | At least 1<br>month                             |
|                     | Drug-induced<br>HPL and serum<br>prolactin level ≥<br>50 ng/mL<br>randomised to<br>aripiprazole-<br>addition (adding<br>aripiprazole to<br>previous<br>antipsychotics) or<br>switching<br>(switching<br>previous<br>antipsychotics to<br>aripiprazole) after<br>baseline<br>enrolment <sup>c</sup> | 32                                                        | Schizophrenia or<br>other another<br>psychotic<br>spectrum disorder                                | DSM-IV      | Paliperidone,<br>risperidone,<br>quetiapine,<br>haloperidol,<br>blonanserin,<br>sulpiride, and<br>clozapine | Antipsychotics                                                 | NR                          | NR                                    | At least 1<br>month                             |
| Yuan, 2008[4]       | Drug-induced<br>HPL randomised                                                                                                                                                                                                                                                                     | 10                                                        | Schizophrenia                                                                                      | ICD-10      | Risperidone                                                                                                 | Antipsychotics                                                 | NR                          | Mean (SD):<br>3.3 (1.0)               |                                                 |

| Author, year                 | Groups/<br>subgroups                                                                           | Patients<br>with drug-<br>induced<br>HPL <sup>a</sup> (n) | Diagnosis                                                                                                                                                                           | ICD/<br>DMS | Treatment<br>known or<br>suspected to<br>have induced<br>HPL (drug) | Treatment known<br>or suspected to have<br>induced HPL (class)                             | Monotherapy/<br>polytherapy | Dose (total<br>dose/day) <sup>b</sup>                       | Treatment<br>duration<br>mean (SD) <sup>b</sup>                            |
|------------------------------|------------------------------------------------------------------------------------------------|-----------------------------------------------------------|-------------------------------------------------------------------------------------------------------------------------------------------------------------------------------------|-------------|---------------------------------------------------------------------|--------------------------------------------------------------------------------------------|-----------------------------|-------------------------------------------------------------|----------------------------------------------------------------------------|
|                              | to peony-<br>glycyrrhiza<br>decoction after<br>baseline<br>enrolment <sup>c</sup>              |                                                           |                                                                                                                                                                                     |             |                                                                     |                                                                                            |                             | mg/day<br>[maintenan<br>ce dose]                            | At least 6<br>months                                                       |
|                              | Drug-induced<br>HPL randomised<br>to bromocriptine<br>after baseline<br>enrolment <sup>c</sup> |                                                           |                                                                                                                                                                                     |             |                                                                     |                                                                                            |                             | Mean (SD):<br>4.1 (1.1)<br>mg/day<br>[maintenan<br>ce dose] |                                                                            |
| <b>Observational studies</b> |                                                                                                |                                                           |                                                                                                                                                                                     |             |                                                                     |                                                                                            |                             |                                                             |                                                                            |
| Ahuja,<br>2008[22]           | NA                                                                                             | 12                                                        | Schizophrenia,<br>schizoaffective<br>disorder, bipolar<br>affective disorder                                                                                                        | ICD-10      | Haloperidol,<br>risperidone,<br>amisulpride,<br>olanzapine          | Antipsychotics                                                                             | Mixed                       | NR                                                          | NR                                                                         |
| Alosaimi,<br>2018[23]        | NA                                                                                             | 442                                                       | Primary disorders:<br>psychotic, bipolar,<br>depressive, and<br>anxiety;<br>personality<br>disorders,<br>secondary<br>psychiatric<br>disorders, multiple<br>disorders and<br>others | NR          | NR                                                                  | Antipsychotics,<br>antidepressants,<br>mood stabilisers, and<br>antianxiety<br>medications | NR                          | NR                                                          | NR                                                                         |
| Atluri,<br>2018[24]          | Levosulpiride                                                                                  | 15                                                        | NR                                                                                                                                                                                  | NR          | Levosulpiride                                                       | D2 antagonists                                                                             | NR                          | NR                                                          | Mean (SD):<br>76.23 (126.1)<br>days; median<br>(range): 30<br>(5–480) days |
|                              | Ranitidine                                                                                     | 2                                                         |                                                                                                                                                                                     |             | Ranitidine                                                          | H2 antagonists                                                                             |                             |                                                             | NR                                                                         |
|                              | Domperidone                                                                                    | 13                                                        |                                                                                                                                                                                     |             | Domperidone                                                         | D2 antagonists                                                                             |                             |                                                             | Mean (SD):<br>22.66 (17.16)<br>days;                                       |

| Author, year           | Groups/<br>subgroups                                                                                                      | Patients<br>with drug-<br>induced<br>HPL <sup>a</sup> (n) | Diagnosis                                                                        | ICD/<br>DMS | Treatment<br>known or<br>suspected to<br>have induced<br>HPL (drug) | Treatment known<br>or suspected to have<br>induced HPL (class) | Monotherapy/<br>polytherapy | Dose (total<br>dose/day) <sup>b</sup>    | Treatment<br>duration<br>mean (SD) <sup>b</sup>              |
|------------------------|---------------------------------------------------------------------------------------------------------------------------|-----------------------------------------------------------|----------------------------------------------------------------------------------|-------------|---------------------------------------------------------------------|----------------------------------------------------------------|-----------------------------|------------------------------------------|--------------------------------------------------------------|
| Barszcz,<br>2007[25]   | NA                                                                                                                        | 25                                                        | Schizophrenia,<br>schizoaffective<br>disorder, organic<br>paranoic disorders     | NR          | NR                                                                  | Antipsychotics                                                 | Mixed                       | NR                                       | Median<br>(range): 15<br>(2–60) days<br>At least 6<br>months |
| Chen, 2010[26]         | Drug-induced<br>HPL assigned to<br>aripiprazole-<br>addition after<br>baseline<br>enrolment<br>(risperidone) <sup>c</sup> | 15                                                        | Schizophrenia,<br>schizoaffective<br>disorder, or bipolar<br>disorder            | DSM-IV      | Risperidone                                                         | Antipsychotics                                                 | Monotherapy                 | Mean (SD):<br>4.7 (2.3)<br>mg/day        | Mean (SD):<br>34.9 (34.9)<br>weeks                           |
|                        | Drug-induced<br>HPL assigned to<br>aripiprazole-<br>addition after<br>baseline<br>enrolment<br>(amisulpride) <sup>c</sup> | 5                                                         |                                                                                  |             | Amisulpride                                                         |                                                                |                             | Mean (SD):<br>460 (260.8)<br>mg/day      | Mean (SD):<br>18.3 (18.3)<br>weeks                           |
|                        | Drug-induced<br>HPL assigned to<br>aripiprazole-<br>addition after<br>baseline<br>enrolment<br>(sulpiride) <sup>c</sup>   | 4                                                         |                                                                                  |             | Sulpiride                                                           |                                                                |                             | Mean (SD):<br>612.5<br>(469.7)<br>mg/day | Mean (SD):<br>69.7 (72.2)<br>weeks                           |
| Emsley,<br>2008[27]    | NA                                                                                                                        | 18                                                        | Schizophrenia,<br>schizophreniform<br>disorder or<br>schizoaffective<br>disorder | DSM-IV      | Risperidone<br>(long-acting<br>injection)                           | Antipsychotics                                                 | Polytherapy                 | 12.5 mg–50<br>mg every<br>2 weeks        | 2 years                                                      |
| Furuhjelm,<br>1980[28] | NA                                                                                                                        | 7                                                         | NR                                                                               | NR          | NR                                                                  | Oral contraceptives                                            | Monotherapy                 | NR                                       | NR                                                           |

| Author, year            | Groups/<br>subgroups | Patients<br>with drug-<br>induced<br>HPL <sup>a</sup> (n) | Diagnosis                                                                                                                                                                                                                                                        | ICD/<br>DMS | Treatment<br>known or<br>suspected to<br>have induced<br>HPL (drug)   | Treatment known<br>or suspected to have<br>induced HPL (class) | Monotherapy/<br>polytherapy | Dose (total<br>dose/day) <sup>b</sup>                                                                                                                             | Treatment<br>duration<br>mean (SD) <sup>b</sup> |
|-------------------------|----------------------|-----------------------------------------------------------|------------------------------------------------------------------------------------------------------------------------------------------------------------------------------------------------------------------------------------------------------------------|-------------|-----------------------------------------------------------------------|----------------------------------------------------------------|-----------------------------|-------------------------------------------------------------------------------------------------------------------------------------------------------------------|-------------------------------------------------|
| Holzer,<br>2006[29]     | NA                   | 5                                                         | Obsessive-<br>compulsive<br>disorder,<br>schizophrenia,<br>schizoaffective<br>disorder, and<br>severe depression<br>with psychotic<br>symptoms                                                                                                                   | ICD-10      | Risperidone                                                           | Antipsychotics                                                 | Polytherapy                 | 0.04 and<br>0.1<br>mg/kg/dose<br>s                                                                                                                                | NR                                              |
| Kalkavoura,<br>2013[30] | NA                   | 80                                                        | Schizophrenia                                                                                                                                                                                                                                                    | DSM-IV      | Risperidone,<br>amisulpride, and<br>haloperidol (most<br>common ones) | Antipsychotics                                                 | Mixed                       | Mean (SD):<br>risperidone<br>4.8 (2.2),<br>risperidone<br>long acting<br>48.6 9<br>(4.1),<br>amisulpride<br>816.6<br>(216.7),<br>haloperidol<br>33.4 (18.5)<br>mg | At least 5<br>years                             |
| Kopecek,<br>2006[31]    | NA                   | 11                                                        | Severe depressive<br>episode without<br>psychotic<br>symptoms,<br>recurrent<br>depressive<br>disorder with<br>current moderate<br>symptoms, panic<br>disorder, mixed<br>anxiety<br>depression,<br>borderline<br>personality<br>disorder, obsessive<br>compulsive | ICD-10      | Risperidone                                                           | Antipsychotics                                                 | Mixed                       | Median:<br>1.25<br>mg/day                                                                                                                                         | Median: 15.5<br>days                            |

| Author, year           | Groups/<br>subgroups | Patients<br>with drug-<br>induced<br>HPL <sup>a</sup> (n) | Diagnosis                                                                                | ICD/<br>DMS | Treatment<br>known or<br>suspected to<br>have induced<br>HPL (drug)                                                                | Treatment known<br>or suspected to have<br>induced HPL (class) | Monotherapy/<br>polytherapy | Dose (total<br>dose/day) <sup>b</sup>                        | Treatment<br>duration<br>mean (SD) <sup>b</sup> |
|------------------------|----------------------|-----------------------------------------------------------|------------------------------------------------------------------------------------------|-------------|------------------------------------------------------------------------------------------------------------------------------------|----------------------------------------------------------------|-----------------------------|--------------------------------------------------------------|-------------------------------------------------|
|                        |                      |                                                           | disorder, post-traumatic stress disorder, adjustment disorder depressive type            |             |                                                                                                                                    |                                                                |                             |                                                              |                                                 |
| Kotan, 2011[32]        | NA                   | 18                                                        | Schizophrenia                                                                            | DSM-IV      | Amisulpride                                                                                                                        | Antipsychotics                                                 | Monotherapy                 | 800 mg/day                                                   | 24 weeks                                        |
| Kulshreshtha, 2017[33] | NA                   | 39                                                        | NR                                                                                       | NR          | Domperidone, levosulpiride, itopride; risperidone, ziprasidone, amisulpride, pimozide, amitriptyline, paroxetine, ethinylestradiol | Prokinetics, antipsychotics and antidepressants, oestrogens    | NR                          | NR                                                           | NR                                              |
| Lankford, 1981[34]     | NA                   | 9                                                         | NR                                                                                       | NR          | Thiothixene, fluphenazine, chlorpromazine, trifluoperazine, mesoridazine, perphenazine                                             | Antipsychotics                                                 | Monotherapy                 | NR                                                           | Range: 2–18 years                               |
| Lee, 2005[35]          | NA                   | 14                                                        | Schizophrenia, schizoaffective disorder, bipolar disorder, and major depressive disorder | DSM-IV      | Risperidone                                                                                                                        | Antipsychotics                                                 | Mixed                       | 2–8 mg/day [maximum doses], 0.5–8 mg/day [maintenance doses] | Range: 3–60 months                              |
| Lee, 2006b[36]         | NA                   | 9                                                         | Schizophrenia, paranoid type, schizoaffective disorder, bipolar type                     | DSM-IV      | Risperidone                                                                                                                        | Antipsychotics                                                 | Monotherapy                 | 2–4 mg/day                                                   | 12 weeks                                        |

| Author, year            | Groups/<br>subgroups | Patients<br>with drug-<br>induced<br>HPL <sup>a</sup> (n) | Diagnosis                                                                                                                                                                                                            | ICD/<br>DMS   | Treatment<br>known or<br>suspected to<br>have induced<br>HPL (drug)                                                   | Treatment known<br>or suspected to have<br>induced HPL (class) | Monotherapy/<br>polytherapy | Dose (total<br>dose/day) <sup>b</sup>                                                                            | Treatment<br>duration<br>mean (SD) <sup>b</sup> |
|-------------------------|----------------------|-----------------------------------------------------------|----------------------------------------------------------------------------------------------------------------------------------------------------------------------------------------------------------------------|---------------|-----------------------------------------------------------------------------------------------------------------------|----------------------------------------------------------------|-----------------------------|------------------------------------------------------------------------------------------------------------------|-------------------------------------------------|
| Leonard,<br>1989[37]    | NA                   | 10                                                        | NR                                                                                                                                                                                                                   | NR            | NR                                                                                                                    | NR                                                             | NR                          | NR                                                                                                               | NR                                              |
| Margari,<br>2015[38]    | NA                   | 13                                                        | Early-onset<br>schizophrenia<br>spectrum<br>psychosis, no-<br>early-onset<br>schizophrenia<br>spectrum<br>psychosis (autism<br>spectrum<br>disorders, tic<br>disorders, and<br>disruptive<br>behaviour<br>disorders) | DSM-IV        | Risperidone                                                                                                           | Antipsychotics                                                 | Monotherapy                 | Mean: 1.2<br>mg/day                                                                                              | Mean: 5.5<br>(range 3–12)<br>months             |
| Matsuoka,<br>1986[39]   | NA                   | 19                                                        | Schizophrenia and<br>non-schizophrenic                                                                                                                                                                               | DSM-III       | NR                                                                                                                    | Antipsychotics                                                 | NR                          | NR                                                                                                               | NR                                              |
| Melkersson,<br>1999[40] | NA                   | 9                                                         | Schizophrenia                                                                                                                                                                                                        | DSM-III-<br>R | Chlorpromazine,<br>zuclopenthixol,<br>haloperidol,<br>thioridazine,<br>pimozide,<br>levomepromazine<br>, perphenazine | Antipsychotics                                                 | Mixed                       | Median<br>(range):<br>255 (40–<br>1,620)<br>mg/day<br>[expressed<br>as<br>chlorproma<br>zine<br>equivalents<br>] | For at least 6<br>months                        |
| Melkersson,<br>2005[41] | Olanzapine           | 7                                                         | Schizophrenia,<br>schizophreniform<br>disorder or<br>schizoaffective<br>disorder                                                                                                                                     | DSM-IV        | Olanzapine                                                                                                            | Antipsychotics                                                 | Monotherapy                 | Median<br>(range): 10<br>(5–20)<br>mg/day                                                                        | Median<br>(range): 0.9<br>(0.2–5.5)<br>years    |
|                         | Risperidone          | 16                                                        | Schizophrenia,<br>schizophreniform                                                                                                                                                                                   |               | Risperidone                                                                                                           |                                                                |                             | Median<br>(range): 3                                                                                             | Median<br>(range): 1.0                          |

| Author, year   | Groups/<br>subgroups | Patients<br>with drug-<br>induced<br>HPL <sup>a</sup> (n) | Diagnosis                                                                                             | ICD/<br>DMS | Treatment<br>known or<br>suspected to<br>have induced<br>HPL (drug) | Treatment known<br>or suspected to have<br>induced HPL (class) | Monotherapy/<br>polytherapy | Dose (total<br>dose/day) <sup>b</sup>        | Treatment<br>duration<br>mean (SD) <sup>b</sup> |
|----------------|----------------------|-----------------------------------------------------------|-------------------------------------------------------------------------------------------------------|-------------|---------------------------------------------------------------------|----------------------------------------------------------------|-----------------------------|----------------------------------------------|-------------------------------------------------|
|                |                      |                                                           | disorder or<br>schizoaffective<br>disorder                                                            |             |                                                                     |                                                                |                             | (1–8)<br>mg/day                              | (0.2–8.8)<br>years                              |
| Park, 2016[42] | Aripiprazole         | 4                                                         | Schizophrenia,<br>bipolar disorder,<br>psychotic<br>depression,<br>schizoaffective<br>disorder        | DSM-IV      | Aripiprazole                                                        | Antipsychotics                                                 | Monotherapy                 | Mean (SD):<br>15.21<br>(9.62)<br>mg/day      | For at least 2<br>weeks                         |
|                | Blonanserin          | 15                                                        | Schizophrenia,<br>bipolar disorder,<br>psychotic<br>depression,<br>psychotic disorder                 |             | Blonanserin                                                         |                                                                |                             | Mean (SD):<br>12.7 (6.27)<br>mg/day          |                                                 |
|                | Olanzapine           | 12                                                        | Schizophrenia,<br>bipolar disorder,<br>psychotic<br>depression                                        |             | Olanzapine                                                          |                                                                |                             | Mean (SD):<br>13.69<br>(6.68)<br>mg/day      |                                                 |
|                | Paliperidone         | 22                                                        | Schizophrenia,<br>bipolar disorder,<br>schizoaffective<br>disorder                                    |             | Paliperidone                                                        |                                                                |                             | Mean (SD):<br>7.03 (3.63)<br>mg/day          |                                                 |
|                | Quetiapine           | 7                                                         | Schizophrenia,<br>bipolar disorder,<br>psychotic<br>depression,<br>schizoaffective<br>disorder        |             | Quetiapine                                                          |                                                                |                             | Mean<br>(SD):<br>361.96<br>(308.7)<br>mg/day |                                                 |
|                | Risperidone          | 34                                                        | Schizophrenia,<br>bipolar disorder,<br>psychotic<br>depression,<br>schizoaffective<br>disorder, brief |             | Risperidone                                                         |                                                                |                             | Mean (SD):<br>4.52 (3.45)<br>mg/day          |                                                 |



| Author, year         | Groups/<br>subgroups | Patients<br>with drug-<br>induced<br>HPL <sup>a</sup> (n) | Diagnosis                                                                                       | ICD/<br>DMS | Treatment<br>known or<br>suspected to<br>have induced<br>HPL (drug)                                                                                                                                                                                                                                                                              | Treatment known<br>or suspected to have<br>induced HPL (class) | Monotherapy/<br>polytherapy | Dose (total<br>dose/day) <sup>b</sup>                | Treatment<br>duration<br>mean (SD) <sup>b</sup>      |
|----------------------|----------------------|-----------------------------------------------------------|-------------------------------------------------------------------------------------------------|-------------|--------------------------------------------------------------------------------------------------------------------------------------------------------------------------------------------------------------------------------------------------------------------------------------------------------------------------------------------------|----------------------------------------------------------------|-----------------------------|------------------------------------------------------|------------------------------------------------------|
| Pollock,<br>1998[43] | NA                   | 8                                                         | psychotic disorder,<br>psychotic disorder<br>NR                                                 | NR          | Each patient took<br>different drug:<br>haloperidol;<br>sulpiride,<br>thioridazine,<br>fluoxetine,<br>procyclidine;<br>venlafaxine,<br>sulpiride,<br>chlorpromazine;<br>fluvoxamine<br>thioridazine;<br>sertraline,<br>sulpiride,<br>chlorpromazine<br>procyclidine;<br>flupenthixol<br>decanoate;<br>thioridazine<br>thyroxine;<br>thioridazine | Antipsychotics                                                 | Mixed                       | NR                                                   | Range: 1–3<br>years                                  |
| Roke, 2012[44]       | Risperidone          | 24                                                        | Primary diagnoses<br>of autism spectrum<br>disorders or<br>disruptive<br>behaviour<br>disorders | NR          | Risperidone                                                                                                                                                                                                                                                                                                                                      | Antipsychotics                                                 | Monotherapy                 | Mean (SD;<br>range): 1.5<br>(0.9; 0.25–<br>4) mg/day | Mean (SD;<br>range): 53<br>(27.8; 16–<br>126) months |
| Seppala,<br>1977[45] | NA                   | 10                                                        | NR                                                                                              | NR          | NR                                                                                                                                                                                                                                                                                                                                               | Oral contraceptives                                            | NR                          | NR                                                   | NR                                                   |
| Smith,<br>1992[46]   | NA                   | 6                                                         | Psychiatric<br>diagnosis                                                                        | NR          | NR                                                                                                                                                                                                                                                                                                                                               | Antipsychotics                                                 | NR                          | NR                                                   | NR                                                   |
| Trenque,<br>2011[47] | NA                   | 187                                                       | NR                                                                                              | NR          | Citalopram,<br>escitalopram,<br>fluoxetine,                                                                                                                                                                                                                                                                                                      | Antidepressants                                                | Mixed                       | NR                                                   | NR                                                   |

| Author, year            | Groups/<br>subgroups               | Patients<br>with drug-<br>induced<br>HPL <sup>a</sup> (n) | Diagnosis                                                                                                                                                                       | ICD/<br>DMS | Treatment<br>known or<br>suspected to<br>have induced<br>HPL (drug) | Treatment known<br>or suspected to have<br>induced HPL (class)                                              | Monotherapy/<br>polytherapy | Dose (total<br>dose/day) <sup>b</sup> | Treatment<br>duration<br>mean (SD) <sup>b</sup> |
|-------------------------|------------------------------------|-----------------------------------------------------------|---------------------------------------------------------------------------------------------------------------------------------------------------------------------------------|-------------|---------------------------------------------------------------------|-------------------------------------------------------------------------------------------------------------|-----------------------------|---------------------------------------|-------------------------------------------------|
| Venetikou,<br>2008[48]  | NA                                 | 6                                                         | NR                                                                                                                                                                              | NR          | NR                                                                  | Antihypertensives,<br>antipsychotics, and<br>antidepressants                                                | NR                          | NR                                    | NR                                              |
| Vilar, 2008[49]         | NA                                 | 180                                                       | NR                                                                                                                                                                              | NR          | NR                                                                  | Anxiolytics, H2<br>antagonists,<br>antihypertensives,<br>prokinetics,<br>antidepressants,<br>antipsychotics | Mixed                       | NR                                    | NR                                              |
| Yunilainen,<br>2018[50] | NA                                 | 120                                                       | Schizophrenia,<br>acute polymorphic<br>psychotic disorder<br>with symptoms of<br>schizophrenia,<br>affective disorders,<br>mental retardation<br>with behavioural<br>impairment | NR          | NR                                                                  | Antipsychotics                                                                                              | NR                          | NR                                    | NR                                              |
| Zhang,<br>2018[51]      | Sexual<br>dysfunction <sup>d</sup> | 56<br>10                                                  | Schizophrenia                                                                                                                                                                   | DSM-V       | Clozapine,<br>risperidone,<br>olanzapine,<br>aripiprazole           | Antipsychotics                                                                                              | NR                          | NR                                    | NR                                              |

<sup>a</sup> Patients diagnosed with drug-induced HPL

<sup>b</sup> Unless otherwise specified

<sup>c</sup> Patients with drug-induced HPL were enrolled and randomised/allocated to treatment of the HPL condition. Data on characteristics and clinical symptoms of drug-induced HPL were collected from baseline data (before patients received treatment to control the HPL)

<sup>d</sup> Sexual dysfunction defined as a total ASEX total score of  $\geq 19$ , and any item with a score of  $\geq 5$  or any three items with a score of  $\geq 4$

*DSM* Diagnostic and Statistical Manual of Mental Disorders, *HPL* hyperprolactinaemia, *ICD-10* International Classification of Diseases, 10<sup>th</sup> Revision, *IM* intramuscular, *IV* intravenous, *NR* not reported, *SD* standard deviation

**Table S5** Other clinical presentations

| Symptom or long-term complication                | Treatment known or suspected to have induced HPL (class)                                        | Patients with drug-induced HPL, <sup>a</sup> (n) | Patients with symptoms, n (%) | Time since start of drug until symptom | Groups at baseline/subgroup populations | Author, year         |
|--------------------------------------------------|-------------------------------------------------------------------------------------------------|--------------------------------------------------|-------------------------------|----------------------------------------|-----------------------------------------|----------------------|
| <b>Clinical trials</b>                           |                                                                                                 |                                                  |                               |                                        |                                         |                      |
| Amenorrhoea and decreased libido                 | Antipsychotics                                                                                  | 19                                               | 11 (58)                       | NR                                     | NA                                      | Cavallaro, 2004[13]  |
| Amenorrhoea, decreased libido, and galactorrhoea |                                                                                                 |                                                  | 2 (11)                        |                                        |                                         |                      |
| <b>Observational studies</b>                     |                                                                                                 |                                                  |                               |                                        |                                         |                      |
| Amenorrhoea and galactorrhoea                    | Anxiolytics, H2-antihistamines, antihypertensives, prokinetics, antidepressants, antipsychotics | 108                                              | 8 (8)                         | NR                                     | Females                                 | Vilar, 2008[49]      |
|                                                  | Antipsychotics                                                                                  | 18                                               | 1 (6)                         | NR                                     | NA                                      | Emsley, 2008[27]     |
| Galactorrhoea and/or oligomenorrhoea             | Antipsychotics                                                                                  | 9                                                | 9 (100)                       | NR                                     | NA                                      | Lankford, 1981[34]   |
| Hypogonadism                                     | Anxiolytics, H2-antihistamines, antihypertensives, prokinetics, antidepressants, antipsychotics | 72                                               | 49.968 (70)                   | NR                                     | Males                                   | Vilar, 2008[49]      |
| Muscle rigidity                                  | Antipsychotics                                                                                  | 11                                               | 1 (10)                        | NR                                     | NA                                      | Kopecek, 2006[31]    |
| Oligomenorrhoea and galactorrhoea                | Antipsychotics                                                                                  | 14                                               | 2 (14)                        | NR                                     | Females                                 | Melkersson, 2005[41] |
| PRL-associated symptoms <sup>b</sup>             | Antipsychotics                                                                                  | 94                                               | 87 (93)                       | NR                                     | NA                                      | Park, 2016[42]       |
| Weight gain                                      | Antipsychotics                                                                                  | 8                                                | 1 (13)                        | NR                                     | NA                                      | Pollock, 1998[43]    |

<sup>a</sup> Patients diagnosed with drug-induced HPL

<sup>b</sup> Amenorrhoea, oligomenorrhoea, menorrhagia, irregular menstruation, mastalgia [breast pain], gynaecomastia, decreased sexual drive, impotence, and orgasmic dysfunction  
*HPL* hyperprolactinaemia, *NA* not applicable, *NR* not reported, *PRL* prolactin

**Table S6** Breast and lactation disorders reported by the included studies

| Symptom or long-term complication | Treatment known or suspected to have induced HPL (class) | Patients with drug-induced HPL, <sup>a</sup> (n) | Patients with symptoms, n (%) | Time since start of drug until symptom | Groups at baseline/subgroup populations | Author, year       |
|-----------------------------------|----------------------------------------------------------|--------------------------------------------------|-------------------------------|----------------------------------------|-----------------------------------------|--------------------|
| <b>Clinical trials</b>            |                                                          |                                                  |                               |                                        |                                         |                    |
| Breast discharge                  | Antipsychotics                                           | 221                                              | 1 (1)                         | NR                                     | NA                                      | Savitz, 2015[16]   |
| Breast pain                       |                                                          |                                                  |                               |                                        |                                         |                    |
| Breast tenderness                 | Antipsychotics                                           | 99                                               | 1 (2)                         | NR                                     | NA                                      | Man, 2016[3]       |
| Galactorrhoea                     | Dopamine antagonists                                     | 6                                                | 1 (17)                        | Mean: 1 week                           | Menstruating females                    | Andersen, 1982[19] |
|                                   | Antipsychotics                                           | 2                                                | 2 (12)                        | Range: 3–4 weeks                       | NA                                      | Atmaca, 2002[6]    |
|                                   | Antipsychotics                                           | 36                                               | 13 (37)                       | NR                                     | NA                                      | Düring, 2019[20]   |
|                                   | Oral contraceptives                                      | 21                                               | 13 (62)                       | NR                                     | NA                                      | Karaman, 1993[8]   |
|                                   | Antipsychotics                                           | 54                                               | 9 (17)                        | NR                                     | NA                                      | Kinon, 2006[9]     |
|                                   | Antipsychotics                                           | 7                                                | 3 (43)                        | NR                                     | NA                                      | Lee, 2006a[14]     |
|                                   | Antipsychotics                                           | 60                                               | 2 (4)                         | NR                                     | NA                                      | Lee, 2010[10]      |
|                                   | Antipsychotics                                           | 20                                               | 3 (15)                        | NR                                     | NA                                      | Lu, 2008[15]       |
|                                   | Antipsychotics                                           | 99                                               | 13 (14)                       | NR                                     | NA                                      | Man, 2016[3]       |
|                                   | Antipsychotics                                           | 30                                               | 2 (7)                         | Mean: 2 months                         | NA                                      | Ranjbar, 2015[18]  |
|                                   | Antipsychotics                                           | 221                                              | 16 (8)                        | NR                                     | NA                                      | Savitz, 2015[16]   |
|                                   | Antipsychotics                                           | 26                                               | 2 (8)                         | NR                                     | NA                                      | Shim, 2007[5]      |
|                                   | Antipsychotics                                           | 20                                               | 5 (25)                        | NR                                     | NA                                      | Yuan, 2008[4]      |
|                                   | Galactorrhoea and gynaecomastia                          | Antipsychotics                                   | 12                            | 1 (9)                                  | NR                                      | NA                 |
| Gynaecomastia                     | Antipsychotics                                           | 36                                               | 12 (34)                       | NR                                     | NA                                      | Düring, 2019[20]   |
|                                   | Antipsychotics                                           | 1                                                | 1 (100)                       | NR                                     | NA                                      | Kelly, 2006[2]     |
|                                   | Antipsychotics                                           | 54                                               | 7 (13)                        | NR                                     | NA                                      | Kinon, 2006[9]     |
|                                   | Antipsychotics                                           | 30                                               | 3 (10)                        | Mean: 2 months                         | NA                                      | Ranjbar, 2015[18]  |
|                                   | Antipsychotics                                           | 221                                              | 6 (3)                         | NR                                     | NA                                      | Savitz, 2015[16]   |
|                                   | Antipsychotics                                           | 13                                               | 2 (16)                        | NR                                     | NA                                      | Trives, 2013[17]   |

| Symptom or long-term complication | Treatment known or suspected to have induced HPL (class)                       | Patients with drug-induced HPL, <sup>a</sup> (n) | Patients with symptoms, n (%) | Time since start of drug until symptom | Groups at baseline/subgroup populations | Author, year           |
|-----------------------------------|--------------------------------------------------------------------------------|--------------------------------------------------|-------------------------------|----------------------------------------|-----------------------------------------|------------------------|
| Lactating                         | Antipsychotics                                                                 | 60                                               | 2 (4)                         | Mean: 4 weeks                          | NA                                      | Qiao, 2016[12]         |
| Mastalgia (breast pain)           | Antipsychotics                                                                 | 13                                               | 3 (24)                        | NR                                     | NA                                      | Trives, 2013[17]       |
| <b>Observational studies</b>      |                                                                                |                                                  |                               |                                        |                                         |                        |
| Galactorrhoea                     | Antipsychotics, antidepressants, mood stabilisers, and antianxiety medications | 442                                              | 23 (6)                        | NR                                     | NA                                      | Alosaimi, 2018[23]     |
|                                   | Dopamine antagonists                                                           | 28                                               | 23 (82)                       | NR                                     | NA                                      | Atluri, 2018[24]       |
|                                   | H2-antihistamines                                                              | 2                                                | 2 (100)                       |                                        |                                         |                        |
|                                   | Antipsychotics                                                                 | 25                                               | 12 (48)                       | NR                                     | NA                                      | Barszcz, 2007[25]      |
|                                   | Antipsychotics                                                                 | 18                                               | 1 (6)                         | NR                                     | NA                                      | Emsley, 2008[27]       |
|                                   | Oral contraceptives                                                            | 7                                                | 1 (15)                        | NR                                     | NA                                      | Furuhjelm, 1980[28]    |
|                                   | Antipsychotics                                                                 | 5                                                | 2 (40)                        | NR                                     | NA                                      | Holzer, 2006[29]       |
|                                   | Antipsychotics                                                                 | 11                                               | 2 (19)                        | NR                                     | NA                                      | Kopecek, 2006[31]      |
|                                   | Prokinetics, antipsychotics and antidepressants, oestrogens                    | 39                                               | 33 (85)                       | NR                                     | NA                                      | Kulshreshtha, 2017[33] |
|                                   | Antipsychotics                                                                 | 14                                               | 4 (29)                        | NR                                     | NA                                      | Lee, 2005[35]          |
|                                   | Antipsychotics                                                                 | 9                                                | 2 (23)                        | Mean: 6 months                         | NA                                      | Lee, 2006b[36]         |
|                                   | Antipsychotics                                                                 | 13                                               | 1 (8)                         | NR                                     | NA                                      | Margari, 2015[38]      |
|                                   | Antipsychotics                                                                 | 19                                               | 13 (69)                       | NR                                     | NA                                      | Matsuoka, 1986[39]     |
|                                   | Antipsychotics                                                                 | 9                                                | 1 (12)                        | NR                                     | Females                                 | Melkersson, 1999[40]   |
|                                   | Oral contraceptives                                                            | 10                                               | 5 (50)                        | NR                                     | NA                                      | Seppala, 1977[45]      |
|                                   | Antipsychotics                                                                 | 6                                                | 2 (34)                        | NR                                     | NA                                      | Smith, 1992[46]        |
|                                   | Antidepressants                                                                | 187                                              | 102 (55)                      | NR                                     | NA                                      | Trenque, 2011[47]      |
|                                   |                                                                                | 180                                              | 25 (14)                       | NR                                     | NA                                      | Vilar, 2008[49]        |

| Symptom or long-term complication | Treatment known or suspected to have induced HPL (class)                                        | Patients with drug-induced HPL, <sup>a</sup> (n) | Patients with symptoms, n (%) | Time since start of drug until symptom | Groups at baseline/subgroup populations | Author, year         |
|-----------------------------------|-------------------------------------------------------------------------------------------------|--------------------------------------------------|-------------------------------|----------------------------------------|-----------------------------------------|----------------------|
| Gynaecomastia                     | Anxiolytics, H2-antihistamines, antihypertensives, prokinetics, antidepressants, antipsychotics | 108                                              | 21 (20)                       |                                        | Females                                 |                      |
|                                   |                                                                                                 | 72                                               | 4 (6)                         |                                        | Males                                   |                      |
|                                   | Antipsychotics                                                                                  | 80                                               | 51 (63)                       | NR                                     | Females                                 | Yunilainen, 2018[50] |
|                                   | Antipsychotics                                                                                  | 8                                                | 5 (63)                        | NR                                     | NA                                      | Pollock, 1998[43]    |
|                                   | Antipsychotics, antidepressants, mood stabilisers, and antianxiety medications                  | 442                                              | 18 (5)                        | NR                                     | NA                                      | Alosaimi, 2018[23]   |
|                                   | Antipsychotics                                                                                  | 5                                                | 3 (60)                        | NR                                     | NA                                      | Holzer, 2006[29]     |
|                                   | Antipsychotics                                                                                  | 56                                               | 3 (6)                         | NR                                     | NA                                      | Park, 2016[42]       |
|                                   | Antipsychotics                                                                                  | 24                                               | 8 (34)                        | NR                                     | NA                                      | Roke, 2012[44]       |
|                                   | Antidepressants                                                                                 | 187                                              | 54 (29)                       | NR                                     | NA                                      | Trenque, 2011[47]    |
|                                   | Antipsychotics                                                                                  | 40                                               | 10 (25)                       | NR                                     | Males                                   | Yunilainen, 2018[50] |
| Mastalgia (breast pain)           | Antidepressants                                                                                 | 187                                              | 21 (12)                       | NR                                     | NA                                      | Trenque, 2011[47]    |

<sup>a</sup> Patients diagnosed with drug-induced HPL  
*HPL* hyperprolactinaemia, *NA* not applicable, *NR* not reported

**Table S7** Female genital system disorders reported by the included studies

| Symptom or long-term complication  | Treatment known or suspected to have induced HPL (class) | Patients with drug-induced HPL, <sup>a</sup> (n) | Patients with symptoms, n (%) | Time since start of drug until symptom | Groups at baseline/subgroup populations  | Author, year         |
|------------------------------------|----------------------------------------------------------|--------------------------------------------------|-------------------------------|----------------------------------------|------------------------------------------|----------------------|
| <b>Observational studies</b>       |                                                          |                                                  |                               |                                        |                                          |                      |
| Vaginal dryness during intercourse | Antipsychotics                                           | 80                                               | 42 (53)<br>15 (19)            | NR                                     | Females (PRSexDQ scale)<br>Females (UKU) | Yunilainen, 2018[50] |

<sup>a</sup> Patients diagnosed with drug-induced HPL

*HPL* hyperprolactinaemia, *NR* not reported, *PRSexDQ* Psychotropic-Related Sexual Dysfunction Questionnaire, *UKU* Udvalg for Kliniske Undersøgelser Side Effects Rating Scale for neuroleptics (task force for clinical investigations)

**Table S8** Hair and skin abnormalities reported by the included studies

| Symptom or long-term complication | Treatment known or suspected to have induced HPL (class) | Patients with drug-induced HPL, <sup>a</sup> (n) | Patients with symptoms, n (%) | Time since start of drug until symptom | Groups at baseline/subgroup populations | Author, year  |
|-----------------------------------|----------------------------------------------------------|--------------------------------------------------|-------------------------------|----------------------------------------|-----------------------------------------|---------------|
| <b>Clinical trials</b>            |                                                          |                                                  |                               |                                        |                                         |               |
| Facial acne and hirsutism         | Antipsychotics                                           | 99                                               | 2 (3)                         | NR                                     | NA                                      | Man, 2016[3]  |
| Facial acne and hirsutism         | Antipsychotics                                           | 20                                               | 1 (5)                         | NR                                     | NA                                      | Yuan, 2008[4] |

<sup>a</sup> Patients diagnosed with drug-induced HPL

*HPL* hyperprolactinemia, *NA* not applicable, *NR* not reported



**Table S9** Infertility reported by the included studies

| Symptom or long-term complication | Treatment known or suspected to have induced HPL (class) | Patients with drug-induced HPL, <sup>a</sup> (n) | Patients with symptoms, n (%) | Time since start of drug until symptom | Groups at baseline/subgroup populations | Author, year         |
|-----------------------------------|----------------------------------------------------------|--------------------------------------------------|-------------------------------|----------------------------------------|-----------------------------------------|----------------------|
| <b>Clinical trials</b>            |                                                          |                                                  |                               |                                        |                                         |                      |
| Anovulation                       | Dopamine antagonists                                     | 6                                                | 2 (34)                        | Mean: 1 week                           | NA                                      | Andersen, 1982[19]   |
| <b>Observational studies</b>      |                                                          |                                                  |                               |                                        |                                         |                      |
| Infertility                       | Dopamine antagonists                                     | 13                                               | 4 (31)                        | NR                                     | NA                                      | Atluri, 2018[24]     |
| Infertility <sup>b</sup>          | Oral contraceptives                                      | 7                                                | 2 (29)                        | NR                                     | NA                                      | Furuhjelm, 1980[28]  |
| Oligospermia                      | Antipsychotics                                           | 7                                                | 1 (15)                        | NR                                     | Males                                   | Melkersson, 2005[41] |

<sup>a</sup> Patients diagnosed with drug-induced HPL

<sup>b</sup> Reported as a long-term complication

*HPL* hyperprolactinemia, *NA* not applicable, *NR* not reported

**Table S10** Menstrual cycle bleeding disorders reported by the included studies

| Symptom or long-term complication                                | Treatment known or suspected to have induced HPL (class) | Patients with drug-induced HPL, <sup>a</sup> (n) | Patients with symptoms, n (%) | Time since start of drug until symptom | Groups at baseline/subgroup populations | Author, year      |
|------------------------------------------------------------------|----------------------------------------------------------|--------------------------------------------------|-------------------------------|----------------------------------------|-----------------------------------------|-------------------|
| <b>Clinical trials</b>                                           |                                                          |                                                  |                               |                                        |                                         |                   |
| Abnormal menstrual duration (oligomenorrhoea and/or amenorrhoea) | Antipsychotics                                           | 20                                               | 20 (100)                      | NR                                     | NA                                      | Yuan, 2008[4]     |
| Abnormal menstruation                                            | Antipsychotics                                           | 99                                               | 53 (54)                       | NR                                     | NA                                      | Man, 2016[3]      |
| Amenorrhoea                                                      | Antipsychotics                                           | 36                                               | 9 (25)                        | NR                                     | NA                                      | Düring, 2019[20]  |
|                                                                  | Oral contraceptives                                      | 21                                               | 21 (100)                      | NR                                     | NA                                      | Karaman, 1993[8]  |
|                                                                  | Antipsychotics                                           | 12                                               | 2 (17)                        | NR                                     | NA                                      | Kelly, 2006[2]    |
|                                                                  | Antipsychotics                                           | 7                                                | 7 (100)                       | NR                                     | NA                                      | Lee, 2006a[14]    |
|                                                                  | Antipsychotics                                           | 60                                               | 48 (80)                       | NR                                     | NA                                      | Lee, 2010[10]     |
|                                                                  | Antipsychotics                                           | 20                                               | 9 (45)                        | NR                                     | NA                                      | Lu, 2008[15]      |
|                                                                  | Antipsychotics                                           | 99                                               | 42 (43)                       | NR                                     | NA                                      | Man, 2016[3]      |
|                                                                  | Antipsychotics                                           | 75                                               | 8 (11)                        | NR                                     | NA                                      | Savitz, 2015[16]  |
|                                                                  | Antipsychotics                                           | 26                                               | 6 (23)                        | NR                                     | NA                                      | Shim, 2007[5]     |
|                                                                  | Antipsychotics                                           | 42                                               | 13 (31)                       | NR                                     | NA                                      | Yoon, 2016[7]     |
|                                                                  | Change in menstruation                                   | Antipsychotics                                   | 27                            | 5 (19)                                 | NR                                      | Females           |
| Menorrhagia                                                      | Antipsychotics                                           | 36                                               | 1 (3)                         | NR                                     | NA                                      | Düring, 2019[20]  |
| Menstrual cycle changes                                          | Antipsychotics                                           | 30                                               | 30 (100)                      | Mean: 2 months                         | NA                                      | Ranjbar, 2015[18] |
| Menstrual irregularities                                         | Antipsychotics                                           | 54                                               | 7 (13)                        | NR                                     | NA                                      | Kinon, 2006[9]    |
| Menstruation irregular                                           | Antipsychotics                                           | 75                                               | 3 (4)                         | NR                                     | NA                                      | Savitz, 2015[16]  |
| Oligo/amenorrhoea                                                | Antipsychotics                                           | 13                                               | 6 (47)                        | NR                                     | NA                                      | Trives, 2013[17]  |
| Oligomenorrhoea                                                  | Antipsychotics                                           | 20                                               | 11 (55)                       | NR                                     | NA                                      | Lu, 2008[15]      |
|                                                                  | Antipsychotics                                           | 26                                               | 5 (20)                        | NR                                     | NA                                      | Shim, 2007[5]     |
|                                                                  | Antipsychotics                                           | 42                                               | 6 (15)                        | NR                                     | NA                                      | Yoon, 2016[7]     |
| Premenstrual tension                                             | Antipsychotics                                           | 13                                               | 1 (8)                         | NR                                     | NA                                      | Trives, 2013[17]  |

| Symptom or long-term complication                                         | Treatment known or suspected to have induced HPL (class)                                        | Patients with drug-induced HPL, <sup>a</sup> (n) | Patients with symptoms, n (%) | Time since start of drug until symptom | Groups at baseline/subgroup populations | Author, year           |
|---------------------------------------------------------------------------|-------------------------------------------------------------------------------------------------|--------------------------------------------------|-------------------------------|----------------------------------------|-----------------------------------------|------------------------|
| <b>Observational studies</b>                                              |                                                                                                 |                                                  |                               |                                        |                                         |                        |
| Abnormal menstruation, such as amenorrhoea and irregular menstrual cycles | Antipsychotics                                                                                  | 10                                               | 10 (100)                      | NR                                     | Females                                 | Park, 2016[42]         |
| Amenorrhoea                                                               | Antipsychotics                                                                                  | 14                                               | 14 (100)                      | Mean: 12 months                        | NA                                      | Lee, 2005[35]          |
|                                                                           | Dopamine antagonists, antipsychotics and antidepressants, oestrogens                            | 39                                               | 4 (11)                        | NR                                     | NA                                      | Kulshreshtha, 2017[33] |
|                                                                           | Antipsychotics                                                                                  | 19                                               | 13 (69)                       | NR                                     | NA                                      | Matsuoka, 1986[39]     |
|                                                                           | Antipsychotics                                                                                  | 12                                               | 11 (92)                       | NR                                     | NA                                      | Ahuja, 2008[22]        |
|                                                                           | Antipsychotics                                                                                  | 18                                               | 1 (6)                         | NR                                     | NA                                      | Emsley, 2008[27]       |
|                                                                           | Oral contraceptives                                                                             | 7                                                | 7 (100)                       | NR                                     | NA                                      | Furuhjelm, 1980[28]    |
|                                                                           | Antipsychotics                                                                                  | 44                                               | 42 (96)                       | NR                                     | Females                                 | Kalkavoura, 2013[30]   |
|                                                                           | Antipsychotics                                                                                  | 18                                               | 1 (6)                         | NR                                     | NA                                      | Kotan, 2011[32]        |
|                                                                           | Antipsychotics                                                                                  | 9                                                | 3 (34)                        | NR                                     | Females                                 | Melkersson, 2005[41]   |
|                                                                           | Anxiolytics, H2-antihistamines, antihypertensives, prokinetics, antidepressants, antipsychotics | 108                                              | 16 (15)                       | NR                                     | Females                                 | Vilar, 2008[49]        |
|                                                                           | Antipsychotics                                                                                  | 80                                               | 8 (10)                        | NR                                     | Females (UKU)                           | Yunilainen, 2018[50]   |
|                                                                           | Antipsychotics                                                                                  | 11                                               | 1 (10)                        | NR                                     | NA                                      | Kopecek, 2006[31]      |
|                                                                           | Antidepressants                                                                                 | 187                                              | 21 (12)                       | NR                                     | NA                                      | Trenque, 2011[47]      |
|                                                                           | Oral contraceptives                                                                             | 10                                               | 10 (100)                      | NR                                     | NA                                      | Seppala, 1977[45]      |
| Antipsychotics                                                            | 8                                                                                               | 6 (75)                                           | NR                            | NA                                     | Pollock, 1998[43]                       |                        |
| Amenorrhoea (absence of menstruation for 6 months or longer)              | Antipsychotics                                                                                  | 6                                                | 3 (50)                        | Mean: 4 months                         | NA                                      | Smith, 1992[46]        |
| Amenorrhoea and delayed menses                                            | Antipsychotics                                                                                  | 18                                               | 1 (6)                         | NR                                     | NA                                      | Emsley, 2008[27]       |
| Dysmenorrhoea                                                             | Antipsychotics                                                                                  | 80                                               | 3.2 (4)                       | NR                                     | Females (UKU)                           | Yunilainen, 2018[50]   |

| Symptom or long-term complication                              | Treatment known or suspected to have induced HPL (class)                                        | Patients with drug-induced HPL, <sup>a</sup> (n) | Patients with symptoms, n (%) | Time since start of drug until symptom | Groups at baseline/subgroup populations | Author, year           |
|----------------------------------------------------------------|-------------------------------------------------------------------------------------------------|--------------------------------------------------|-------------------------------|----------------------------------------|-----------------------------------------|------------------------|
|                                                                | Antipsychotics                                                                                  | 25                                               | 20 (80)                       | NR                                     | NA                                      | Barszcz, 2007[25]      |
| Menstrual abnormalities (e.g., oligomenorrhoea or amenorrhoea) | Antipsychotics                                                                                  | 9                                                | 7 (78)                        | Mean: 6 months                         | NA                                      | Lee, 2006b[36]         |
| Menstrual cycle impairments                                    | Antipsychotics                                                                                  | 80                                               | 43.2 (54)                     | NR                                     | NA (UKU)                                | Yunilainen, 2018[50]   |
| Menstrual disturbances                                         | Antipsychotics                                                                                  | 7                                                | 5 (72)                        | NR                                     | Females                                 | Melkersson, 1999[40]   |
| Menstrual irregularities                                       | Antipsychotics, antidepressants, mood stabilisers, and antianxiety medications                  | 442                                              | 56 (13)                       | NR                                     | NA                                      | Alosaimi, 2018[23]     |
|                                                                | Antipsychotics                                                                                  | 13                                               | 1 (8)                         | NR                                     | NA                                      | Margari, 2015[38]      |
|                                                                | Antipsychotics                                                                                  | 18                                               | 2 (12)                        | NR                                     | NA                                      | Kotan, 2011[32]        |
| Oligomenorrhoea                                                | NR                                                                                              | 13                                               | 1 (8)                         | NR                                     | NA                                      | Atluri, 2018[24]       |
|                                                                | Prokinetics, antipsychotics and antidepressants, oestrogens                                     | 39                                               | 14 (36)                       | NR                                     | NA                                      | Kulshreshtha, 2017[33] |
|                                                                | Antipsychotics                                                                                  | 9                                                | 1 (12)                        | NR                                     | Females                                 | Melkersson, 2005[41]   |
|                                                                | Anxiolytics, H2-antihistamines, antihypertensives, prokinetics, antidepressants, antipsychotics | 108                                              | 20.952 (20)                   | NR                                     | Females                                 | Vilar, 2008[49]        |
|                                                                | Antipsychotics                                                                                  | 80                                               | 28.8 (36)                     | NR                                     | Females (UKU)                           | Yunilainen, 2018[50]   |
| Oligomenorrhoea (menstrual intervals between 35 and 180 days)  | Antipsychotics                                                                                  | 6                                                | 3 (50)                        | Mean: 4 months                         | NA                                      | Smith, 1992[46]        |
| Oligomenorrhoea or amenorrhoea                                 | Antipsychotics                                                                                  | 24                                               | 11 (46)                       | NR                                     | NA                                      | Chen, 2010[26]         |
| Oligomenorrhoea                                                | Antipsychotics                                                                                  | 8                                                | 1 (13)                        | NR                                     | NA                                      | Pollock, 1998[43]      |
| Polymenorrhagia                                                | Antipsychotics                                                                                  | 80                                               | 2.4 (3)                       | NR                                     | Females (UKU)                           | Yunilainen, 2018[50]   |

<sup>a</sup> Patients diagnosed with drug-induced HPL

HPL hyperprolactinaemia, NR not reported, PRSexDQ Psychotropic-Related Sexual Dysfunction Questionnaire, UKU Udvalg for Kliniske Undersøgelser Side Effects Rating Scale for neuroleptics (task force for clinical investigations)

**Table S11** Sexual dysfunction as reported by the included studies

| Symptom or long-term complication         | Treatment known or suspected to have induced HPL (class) | Patients with drug-induced HPL, <sup>a</sup> (n) | Patients with symptoms, n (%) | Time since start of drug until symptom | Groups at baseline/subgroup populations | Author, year             |
|-------------------------------------------|----------------------------------------------------------|--------------------------------------------------|-------------------------------|----------------------------------------|-----------------------------------------|--------------------------|
| <b>Clinical trials</b>                    |                                                          |                                                  |                               |                                        |                                         |                          |
| Decreased desire                          | Antipsychotics                                           | 36                                               | 13 (37)                       | NR                                     | NA                                      | Düring, 2019[20]         |
| Decreased libido                          | Antipsychotics                                           | 99                                               | 1 (2)                         | NR                                     | NA                                      | Man, 2016[3]             |
|                                           | Antipsychotics                                           | 221                                              | 1 (1)                         | NR                                     | NA                                      | Savitz, 2015[16]         |
|                                           | Antipsychotics                                           | 13                                               | 10 (77)                       | NR                                     | NA                                      | Trives, 2013[17]         |
| Decreased lubrication                     | Antipsychotics                                           | 36                                               | 3 (9)                         | NR                                     | NA                                      | Düring, 2019[20]         |
| Delayed ejaculation                       | Antipsychotics                                           | 27                                               | 4 (15)                        | NR                                     | NA                                      | Mir, 2008[21]            |
| Ejaculatory dysfunction                   | Antipsychotics                                           | 36                                               | 4 (12)                        | NR                                     | NA                                      | Düring, 2019[20]         |
| Erectile difficulties                     | Antipsychotics                                           | 27                                               | 6 (23)                        | NR                                     | NA                                      | Mir, 2008[21]            |
|                                           | Antipsychotics                                           | 36                                               | 4 (12)                        | NR                                     | NA                                      | Düring, 2019[20]         |
| Erectile dysfunction                      | Antipsychotics                                           | 146                                              | 1 (1)                         | NR                                     | Males                                   | Savitz, 2015[16]         |
|                                           | Antipsychotics                                           | 19                                               | 6 (32)                        | NR                                     | NA                                      | Cavallaro, 2004[13]      |
| Erectile dysfunction and decreased libido | Antipsychotics                                           | 19                                               | 6 (32)                        | NR                                     | NA                                      | Cavallaro, 2004[13]      |
| Impotence                                 | Antipsychotics                                           | 13                                               | 2 (16)                        | NR                                     | NA                                      | Trives, 2013[17]         |
| Increased desire                          | Antipsychotics                                           | 36                                               | 6 (17)                        | NR                                     | NA                                      | Düring, 2019[20]         |
| Loss of libido                            | Antipsychotics                                           | 27                                               | 10 (38)                       | NR                                     | NA                                      | Mir, 2008[21]            |
| Orgasmic difficulties                     | Antipsychotics                                           | 27                                               | 6 (23)                        | NR                                     | NA                                      |                          |
| Orgasmic dysfunction                      | Antipsychotics                                           | 36                                               | 3 (9)                         | NR                                     | NA                                      | Düring, 2019[20]         |
| Problems of sexual arousal                | Antipsychotics                                           | 27                                               | 6 (23)                        | NR                                     | NA                                      | Mir, 2008[21]            |
| Reduction in ejaculation volume/intensity | Antipsychotics                                           | 27                                               | 4 (15)                        | NR                                     | NA                                      |                          |
| Sexual ADRs                               | Antipsychotics                                           | 28                                               | 11 (39)                       | Mean: 1 year                           | NA                                      | Perez-Iglesias, 2012[11] |
| Sexual dysfunction                        | Antipsychotics                                           | 30                                               | 9 (30)                        | Mean: 2 months                         | NA                                      | Ranjbar, 2015[18]        |
|                                           | Antipsychotics                                           | 42                                               | 23 (55)                       | NR                                     | NA                                      | Yoon, 2016[7]            |
| <b>Observational studies</b>              |                                                          |                                                  |                               |                                        |                                         |                          |

| Symptom or long-term complication                  | Treatment known or suspected to have induced HPL (class)                       | Patients with drug-induced HPL, <sup>a</sup> (n) | Patients with symptoms, n (%) | Time since start of drug until symptom | Groups at baseline/subgroup populations | Author, year         |
|----------------------------------------------------|--------------------------------------------------------------------------------|--------------------------------------------------|-------------------------------|----------------------------------------|-----------------------------------------|----------------------|
| Anorgasmia                                         | Antipsychotics                                                                 | 18                                               | 2 (12)                        | NR                                     | NA                                      | Kotan, 2011[32]      |
| Decreased libido                                   | Antipsychotics                                                                 | 7                                                | 1 (15)                        | NR                                     | Males                                   | Melkersson, 2005[41] |
|                                                    | Antipsychotics, antidepressants, mood stabilisers, and antianxiety medications | 442                                              | 75 (17)                       | NR                                     | NA                                      | Alosaimi, 2018[23]   |
|                                                    | Antipsychotics                                                                 | 18                                               | 2 (12)                        | NR                                     | NA                                      | Kotan, 2011[32]      |
|                                                    | Antipsychotics                                                                 | 120                                              | 67.2 (56)                     | NR                                     | NA (PRSexDQ scale)                      | Yunilainen, 2018[50] |
|                                                    | Antipsychotics                                                                 | 120                                              | 62.4 (52)                     | NR                                     | NA (UKU)                                |                      |
|                                                    | Antipsychotics                                                                 | 80                                               | 49.6 (62)                     | NR                                     | Females (PRSexDQ scale)                 |                      |
|                                                    | Antipsychotics                                                                 | 80                                               | 44 (55)                       | NR                                     | Females (UKU)                           |                      |
|                                                    | Antipsychotics                                                                 | 40                                               | 18.4 (46)                     | NR                                     | Males (UKU)                             |                      |
| Degraded quality of life due to sexual impairments | Antipsychotics                                                                 | 80                                               | 44.8 (56)                     | NR                                     | Females (PRSexDQ scale)                 | Yunilainen, 2018[50] |
|                                                    | Antipsychotics                                                                 | 120                                              | 61.2 (51)                     | NR                                     | NA (PRSexDQ scale)                      |                      |
|                                                    | Antipsychotics                                                                 | 40                                               | 16 (40)                       | NR                                     | Males (UKU)                             |                      |
| Delayed onset of orgasms                           | Antipsychotics                                                                 | 80                                               | 39.2 (49)                     | NR                                     | Females (PRSexDQ scale)                 | Yunilainen, 2018[50] |
|                                                    | Antipsychotics                                                                 | 40                                               | 10.8 (27)                     | NR                                     | Males (UKU)                             |                      |
|                                                    | Antipsychotics                                                                 | 120                                              | 50.4 (42)                     | NR                                     | NA (PRSexDQ scale)                      |                      |
| Difficulty achieving orgasm                        | Antipsychotics                                                                 | 120                                              | 69.6 (58)                     | NR                                     | NA (PRSexDQ scale)                      | Yunilainen, 2018[50] |
|                                                    | Antipsychotics                                                                 | 80                                               | 52 (65)                       | NR                                     | Females (PRSexDQ scale)                 |                      |
| Erectile dysfunction                               | Antipsychotics                                                                 | 40                                               | 16 (40)                       | NR                                     | Males (UKU)                             |                      |
|                                                    | Antipsychotics                                                                 | 9                                                | 2 (23)                        | Mean: 6 months                         | NA                                      | Lee, 2006b[36]       |
|                                                    | NR                                                                             | 10                                               | 10 (100)                      | NR                                     | Males                                   | Leonard, 1989[37]    |
|                                                    | Antihypertensives, antipsychotics, and antidepressants                         | 6                                                | 6 (100)                       | NR                                     | Males                                   | Venetikou, 2008[48]  |

| Symptom or long-term complication                                                                                                     | Treatment known or suspected to have induced HPL (class) | Patients with drug-induced HPL, <sup>a</sup> (n) | Patients with symptoms, n (%) | Time since start of drug until symptom | Groups at baseline/subgroup populations | Author, year         |
|---------------------------------------------------------------------------------------------------------------------------------------|----------------------------------------------------------|--------------------------------------------------|-------------------------------|----------------------------------------|-----------------------------------------|----------------------|
| Impaired erection                                                                                                                     | Antipsychotics                                           | 40                                               | 9.6 (24)                      | NR                                     | Males (UKU)                             | Yunilainen, 2018[50] |
| Impaired orgasm                                                                                                                       | Antipsychotics                                           | 80                                               | 38 (48)                       | NR                                     | Females (UKU)                           | Yunilainen, 2018[50] |
|                                                                                                                                       | Antipsychotics                                           | 120                                              | 51.6 (43)                     | NR                                     | NA (UKU)                                |                      |
| Impotence                                                                                                                             | Antipsychotics                                           | 7                                                | 1 (15)                        | NR                                     | Males                                   | Melkersson, 2005[41] |
| Increased libido                                                                                                                      | Antipsychotics                                           | 120                                              | 25.2 (21)                     | NR                                     | NA (UKU)                                | Yunilainen, 2018[50] |
|                                                                                                                                       | Antipsychotics                                           | 80                                               | 16 (20)                       | NR                                     | Females (UKU)                           |                      |
| Sexual disorders, mainly ejaculation disorders                                                                                        | Antidepressants                                          | 187                                              | 7 (4)                         | NR                                     | NA                                      | Trenque, 2011[47]    |
| Sexual dysfunction                                                                                                                    | Antipsychotics                                           | 19                                               | 6 (32)                        | NR                                     | NA                                      | Matsuoka, 1986[39]   |
|                                                                                                                                       | Antipsychotics                                           | 24                                               | 5 (21)                        | NR                                     | NA                                      | Roke, 2012[44]       |
| Sexual dysfunction, ASEX total score of $\geq 19$ , and any item with a score of $\geq 5$ or any three items with a score of $\geq 4$ | Antipsychotics                                           | 56                                               | 56 (100)                      | NR                                     | Patients with sexual dysfunction        | Zhang, 2018[51]      |

<sup>a</sup> Patients diagnosed with drug-induced HPL

*ASEX* Arizona Sexual Experience, *HPL* hyperprolactinaemia, *NR* not reported, *PRSexDQ* Psychotropic-Related Sexual Dysfunction Questionnaire, *UKU* Udvalg for Kliniske Undersøgelser Side Effects Rating Scale for neuroleptics (task force for clinical investigations)

- Higgins JPT, Thomas J, Chandler J, Cumpston M, Li T, Page MJ, et al., editors. Cochrane Handbook for Systematic Reviews of Interventions version 6.1 (updated September 2020). Available from [www.training.cochrane.org/handbook](http://www.training.cochrane.org/handbook): Cochrane; 2020.
- Kelly DL, Conley RR. A randomized double-blind 12-week study of quetiapine, risperidone or fluphenazine on sexual functioning in people with schizophrenia. *Psychoneuroendocrinology*. 2006;31(3):340-6.

3. Man SC, Li XB, Wang HH, Yuan HN, Wang HN, Zhang RG, et al. Peony-Glycyrrhiza Decoction for Antipsychotic-Related Hyperprolactinemia in Women with Schizophrenia: A Randomized Controlled Trial. *Journal of Clinical Psychopharmacology*. 2016;36(6):572-9.
4. Yuan HN, Wang CY, Sze CW, Tong Y, Tan QR, Feng XJ, et al. A randomized, crossover comparison of herbal medicine and bromocriptine against risperidone-induced hyperprolactinemia in patients with Schizophrenia. *Journal of Clinical Psychopharmacology*. 2008;28(3):264-70.
5. Shim JC, Shin JGK, Kelly DL, Jung DU, Seo YS, Liu KH, et al. Adjunctive treatment with a dopamine partial agonist, aripiprazole, for antipsychotic-induced hyperprolactinemia: A placebo-controlled trial. *American Journal of Psychiatry*. 2007;164(9):1404-10.
6. Atmaca M, Kuloglu M, Tezcan E, Canatan H, Gecici O. Quetiapine is not associated with increase in prolactin secretion in contrast to haloperidol. *Archives of Medical Research*. 2002;33(6):562-5.
7. Yoon HW, Lee JS, Park SJ, Lee SK, Choi WJ, Kim TY, et al. Comparing the effectiveness and safety of the addition of and switching to aripiprazole for resolving antipsychotic-induced hyperprolactinemia: A multicenter, open-label, prospective study. *Clinical Neuropharmacology*. 2016;39(6):288-94.



8. Karaman AS, Uran B, Erler A. Serum prolactin levels in postpill amenorrheic patients. *International journal of gynaecology and obstetrics: the official organ of the International Federation of Gynaecology and Obstetrics*. 1993;43(2):177-80.
9. Kinon BJ, Ahl J, Liu-Seifert H, Maguire GA. Improvement in hyperprolactinemia and reproductive comorbidities in patients with schizophrenia switched from conventional antipsychotics or risperidone to olanzapine. *Psychoneuroendocrinology*. 2006;31(5):577-88.
10. Lee MS, Song HC, An H, Yang J, Ko YH, Jung IK, et al. Effect of bromocriptine on antipsychotic drug-induced hyperprolactinemia: Eight-week randomized, single-blind, placebo-controlled, multicenter study. *Psychiatry and Clinical Neurosciences*. 2010;64(1):19-27.
11. Perez-Iglesias R, Mata I, Martinez-Garcia O, Garcia-Unzueta MT, Amado JA, Valdizan EM, et al. Long-term effect of haloperidol, olanzapine, and risperidone on plasma prolactin levels in patients with first-episode psychosis. *Journal of Clinical Psychopharmacology*. 2012;32(6):804-8.
12. Qiao Y, Yang F, Li C, Guo Q, Wen H, Zhu S, et al. Add-on effects of a low-dose aripiprazole in resolving hyperprolactinemia induced by risperidone or paliperidone. *Psychiatry Research*. 2016;237(-):83-9.
13. Cavallaro R, Cocchi F, Angelone SM, Lattuada E, Smeraldi E. Cabergoline treatment of risperidone-induced hyperprolactinemia: a pilot study. *The Journal of clinical psychiatry*. 2004;65(2):187-90.

14. Lee BH, Kim YK, Park SH. Using aripiprazole to resolve antipsychotic-induced symptomatic hyperprolactinemia: A pilot study. *Progress in Neuro-Psychopharmacology and Biological Psychiatry*. 2006a;30(4):714-7.
15. Lu ML, Shen WW, Chen CH. Time course of the changes in antipsychotic-induced hyperprolactinemia following the switch to aripiprazole. *Progress in Neuro-Psychopharmacology and Biological Psychiatry*. 2008;32(8):1978-81.
16. Savitz A, Lane R, Nuamah I, Singh J, Hough D, Gopal S. Long-Term Safety of Paliperidone Extended Release in Adolescents with Schizophrenia: An Open-Label, Flexible Dose Study. *Journal of Child and Adolescent Psychopharmacology*. 2015;25(7):548-57.
17. Trives MZ, Llacer JMB, Escudero MAG, Pastor CJM. Effect of the addition of aripiprazole on hyperprolactinemia associated with risperidone long-acting injection. *Journal of Clinical Psychopharmacology*. 2013;33(4):538-41.
18. Ranjbar F, Sadeghi-Bazargani H, Khams PN, Arfaie A, Salari A, Farahbakhsh M. Adjunctive treatment with aripiprazole for risperidone-induced hyperprolactinemia. *Neuropsychiatric Disease and Treatment*. 2015;11(-):549-55.
19. Andersen AN, Schioler V, Hertz J, Bennett P. Effect of metoclopramide induced hyperprolactinaemia on the gonadotrophic response to oestradiol and LRH. *Acta Endocrinologica*. 1982;100(1):1-9.
20. During SW, Nielsen MO, Bak N, Glenthøj BY, Ebdrup BH. Sexual dysfunction and hyperprolactinemia in schizophrenia before and after six weeks of D2/3 receptor blockade - An exploratory study. *Psychiatry Research*. 2019;274(-):58-65.

21. Mir A, Shivakumar K, Williamson RJ, McAllister V, O'Keane V, Aitchison KJ. Change in sexual dysfunction with aripiprazole: A switching or add-on study. *Journal of Psychopharmacology*. 2008;22(3):244-53.
22. Ahuja N, Moorhead S, Lloyd AJ, Cole AJ. Antipsychotic-induced hyperprolactinemia and delusion of pregnancy. *Psychosomatics*. 2008;49(2):163-7.
23. Alosaimi FD, Fallata EO, Abalhassan M, Alhabbad A, Alzain N, Alhaddad B, et al. Prevalence and risk factors of hyperprolactinemia among patients with various psychiatric diagnoses and medications. *International journal of psychiatry in clinical practice*. 2018;22(4):274-81.
24. Atluri S, Sarathi V, Goel A, Boppana R, Shivaprasad C. Etiological profile of galactorrhoea. *Indian Journal of Endocrinology and Metabolism*. 2018;22(4):489-93.
25. Barszcz Z, Mucha S, Rabe-Jablonska J. Co-medication with psychotropic drugs, including antipsychotic drugs, and bromocriptine: Changes in clinical signs of hyperprolactinaemia and prolactin level. *Psychiatria i Psychologia Kliniczna*. 2007;7(3):154-64.
26. Chen CK, Huang YS, Ree SC, Hsiao CC. Differential add-on effects of aripiprazole in resolving hyperprolactinemia induced by risperidone in comparison to benzamide antipsychotics. *Progress in Neuro-Psychopharmacology and Biological Psychiatry*. 2010;34(8):1495-9.

27. Emsley R, Medori R, Koen L, Oosthuizen PP, Niehaus DJH, Rabinowitz J. Long-acting injectable risperidone in the treatment of subjects with recent-onset psychosis: A preliminary study. *Journal of Clinical Psychopharmacology*. 2008;28(2):210-3.
28. Furuhjelm M, Rydner T, Carlstrom K. Hyperprolactinemia in cases of infertility and amenorrhea. *Acta obstetrica et gynecologica Scandinavica*. 1980;59(2):137-41.
29. Holzer L, Eap CB. Risperidone-induced symptomatic hyperprolactinemia in adolescents. *Journal of Clinical Psychopharmacology*. 2006;26(2):167-71.
30. Kalkavoura CS, Michopoulos I, Arvanitakis P, Theodoropoulou P, Dimopoulou K, Tzebelikos E, et al. Effects of cabergoline on hyperprolactinemia, psychopathology, and sexual functioning in schizophrenic patients. *Experimental and clinical psychopharmacology*. 2013;21(4):332-41.
31. Kopecek M, Bares M, Horacek J, Mohr P. Low-dose risperidone augmentation of antidepressants or anxiolytics is associated with hyperprolactinemia. *Neuroendocrinology Letters*. 2006;27(6):803-6.
32. Kotan Z, Ertepe B, Akkaya C, Sarandol E, Ozkaya G, Kirli S. Metabolic, endocrinologic and cardiac effects of amisulpride: A 24-week follow-up study. *Therapeutic Advances in Psychopharmacology*. 2011;1(6):189-96.

33. Kulshreshtha B, Pahuja I, Kothari D, Chawla I, Sharma N, Gupta S, et al. Menstrual cycle abnormalities in patients with prolactinoma and drug-induced hyperprolactinemia. *Indian Journal of Endocrinology and Metabolism*. 2017;21(4):545-50.
34. Lankford HV, Blackard WG, Gardner DF, Tucker HS. Effects of thyrotropin-releasing hormone and metoclopramide in patients with phenothiazine-induced hyperprolactinemia. *The Journal of clinical endocrinology and metabolism*. 1981;53(1):109-2.
35. Lee BH, Han CS, Kim KH, Kim YK. Treatment in risperidone-induced amenorrhoea. *International Journal of Psychiatry in Clinical Practice*. 2005;9(1):29-34.
36. Lee BH, Kim YK. The relationship between prolactin response and clinical efficacy of risperidone in acute psychotic inpatients. *Progress in Neuro-Psychopharmacology and Biological Psychiatry*. 2006b;30(4):658-62.
37. Leonard MP, Nickel CJ, Morales A. Hyperprolactinemia and impotence: Why, when and how to investigate. *Journal of Urology*. 1989;142(4):992-4.
38. Margari L, Matera E, Petruzzelli MG, Simone M, Lamanna AL, Pastore A, et al. Prolactin variations during risperidone therapy in a sample of drug-naive children and adolescents. *International Clinical Psychopharmacology*. 2015;30(2):103-8.
39. Matsuoka I, Nakai T, Miyake M, Hirai M, Ikawa G. Effects of bromocriptine on neuroleptic-induced amenorrhea, galactorrhea and impotence. *The Japanese journal of psychiatry and neurology*. 1986;40(4):639-46.

40. Melkersson K, Hulting AL, Hall K. Hormonal evaluation in schizophrenic patients treated with neuroleptics. *Neuroendocrinology Letters*. 1999;20(3-4):199-204.
41. Melkersson K. Differences in prolactin elevation and related symptoms of atypical antipsychotics in schizophrenic patients. *Journal of Clinical Psychiatry*. 2005;66(6):761-7.
42. Park YM, Lee SH, Lee BH, Lee KY, Lee KS, Kang SG, et al. Prolactin and macroprolactin levels in psychiatric patients receiving atypical antipsychotics: A preliminary study. *Psychiatry Research*. 2016;239(-):184-9.
43. Pollock A, McLaren EH. Serum prolactin concentration in patients taking neuroleptic drugs. *Clinical Endocrinology*. 1998;49(4):513-6.
44. Roke Y, Buitelaar JK, Boot AM, Tenback D, Van Harten PN. Risk of hyperprolactinemia and sexual side effects in males 10-20 years old diagnosed with autism spectrum disorders or disruptive behavior disorder and treated with risperidone. *Journal of Child and Adolescent Psychopharmacology*. 2012;22(6):432-9.
45. Seppala M, Lehtovirta P, Ranta T. Discordant patterns of hyperprolactinaemia and galactorrhoea in secondary amenorrhoea. *Acta endocrinologica*. 1977;86(3):457-63.

46. Smith S. Neuroleptic-associated hyperprolactinemia: Can it be treated with bromocriptine? *Journal of Reproductive Medicine for the Obstetrician and Gynecologist*. 1992;37(8):737-40.
47. Trenque T, Herlem E, Auriche P, Dram M. Serotonin reuptake inhibitors and hyperprolactinaemia: A casenon-case study in the french pharmacovigilance database. *Drug Safety*. 2011;34(12):1161-6.
48. Venetikou MS, Lambou T, Gizani D. Hyperprolactinaemia due to hypothalamic-pituitary disease or drug-induced in patients with erectile dysfunction. *Andrologia*. 2008;40(4):240-4.
49. Vilar L, Freitas MC, Naves LA, Casulari LA, Azevedo M, Montenegro Jr R, et al. Diagnosis and management of hyperprolactinemia: Results of a Brazilian multicenter study with 1234 patients. *Journal of Endocrinological Investigation*. 2008;31(5):436-44.
50. Yunilainen OA, Starostina EG, Dzeranova LK, Kudryashkina GN, Kessel'man LG, Baranov PA, et al. Neuroleptic-Associated Hyperprolactinemia: Clinical Manifestations and Effects on Sexual Function. *Neuroscience and Behavioral Physiology*. 2018;48(3):358-66.
51. Zhang Y, Tang Z, Ruan Y, Huang C, Wu J, Lu Z, et al. Prolactin and Thyroid Stimulating Hormone (TSH) Levels and Sexual Dysfunction in Patients with Schizophrenia Treated with Conventional Antipsychotic Medication: A Cross-Sectional Study. *Medical science monitor : international medical journal of experimental and clinical research*. 2018;24(-):9136-43.
